# Supplementary material
Source: Royal Society of Chemistry journal article supplement (doi:10.1039/d5fb00560d)
Supplement: d5fb00560d1.pdf [file d5fb00560d1.pdf]

## Electronic Supplementary Information

### An assessment of spruce wood as a replacement for peat in the production of whisky: chemical and sensory analysis of new make spirits.

#### FT-ICR-MS

Spectral processing was carried out with CoreMS 2.5.2.beta in Python 3.11.4 starting with an intrinsic error investigation (Corilo et al., 2021, Van Rossum et al., 2009). Peaks were picked according to a signal to noise threshold based on the logarithmic intensity of each peak, including noise and analyte peaks (Zhurov et al., 2014) using standard deviations of 10 and the number of bins used in the histogram was set to 500. The minimum relative intensity required for a peak to be picked was set to 1%. Initial formula assignments were made with the elemental limits  $C_{0-100}H_{0-200}O_{0-26}$  and a maximum/minimum error threshold of  $\pm 5$  ppm. For each spectrum, the m/z and m/z error of each picked peak were then plotted to examine the intrinsic error distribution of the instrument. From this a ppm error range was generated from which only peaks within the range were calibrated using a polynomial function and a calibration list of known whisky compounds (Kew, 2018). Final formula assignments were made using the elemental limits  $C_{1-90}H_{4-200}O_{0-26}S_{0-5}N_{0-5}$  for m/z between 100 and 800 and a maximum/minimum error threshold of  $\pm 0.25$  ppm. Formula assignments were also made on each blank spectrum to identify any potential contaminants, which were defined as any assigned peaks with a peak height greater than 5% of the highest assigned peak in each blank spectrum. The formulae corresponding to these peaks were removed from sample mass lists.

Python was used to apply a mass filter to the triplicate samples where any formula that appeared in only one replicate was removed. Average mass lists were produced from triplicate samples with each mass given an average peak height from the triplicate samples. These mass lists were analysed in Python, using PyKrev 1.2.4, and UpSet Plot 0.8.0 (Kitson et al., 2021; Seabold et al., 2010). Pykrev automatically removes isotopologues from mass lists. Attributes for each sample were determined, including average numbers of individual elements compound classes determined using both constituent elements and multidimensional stoichiometric compound classification (MSCC) (Rivas-Ubach et al., 2018).

| Sample | Assigned Formula | Mean Mz | Mean C | Mean H | Mean N | Mean O | Mean S | OC | HC | DBE | AI | NOSC |
|--------|------------------|---------|--------|--------|--------|--------|--------|----|----|-----|----|------|
|--------|------------------|---------|--------|--------|--------|--------|--------|----|----|-----|----|------|

|                           |                |                       |                      |                  |                             |              |               |               |               |              |        |         |
|---------------------------|----------------|-----------------------|----------------------|------------------|-----------------------------|--------------|---------------|---------------|---------------|--------------|--------|---------|
| <b>Low wines-Average</b>  | 2247           | 341.3819              | 17.9226              | 25.6088          | 0.2158                      | 5.8567       | 0.1504        | 0.3687        | 1.4416        | 6.2261       | 0.1417 | -0.6344 |
| <b>Fraction 1-Average</b> | 1715           | 359.5482              | 19.4781              | 31.3394          | 0.4204                      | 5.4309       | 0.07755       | 0.3142        | 1.5913        | 5.0186       | 0.0911 | -0.8856 |
| <b>Fraction 2-Average</b> | 2651           | 362.6694              | 18.6137              | 27.4123          | 0.5462                      | 6.4085       | 0.07922       | 0.3860        | 1.4608        | 6.1807       | 0.1165 | -0.5709 |
| <b>Fraction 3-Average</b> | 1803           | 339.7301              | 18.1503              | 26.4908          | 0.3644                      | 5.5080       | 0.09484       | 0.3389        | 1.4766        | 6.0871       | 0.1389 | -0.7192 |
| <b>Peated-Average</b>     | 2700           | 368.7842              | 19.0863              | 30.2252          | 0.2037                      | 6.4204       | 0.1485        | 0.3845        | 1.5702        | 5.0756       | 0.0665 | -0.7291 |
| <b>Sample</b>             | <b>Lipid %</b> | <b>Carbohydrate %</b> | <b>Amino sugar %</b> | <b>Peptide %</b> | <b>Tannin/Lignin like %</b> | <b>CHO %</b> | <b>CHOS %</b> | <b>CHON %</b> | <b>CHNS %</b> | <b>CHS %</b> |        |         |
| <b>Low wines-Average</b>  | 49.9778        | 1.6911                | 0.2670               | 4.4949           | 37.6502                     | 76.4130      | 13.6182       | 8.4557        | 0.1780        | 1.2461       |        |         |
| <b>Fraction 1-Average</b> | 70.2041        | 0.9329                | 0.1749               | 3.7318           | 21.8076                     | 75.3353      | 5.9475        | 16.7930       | 0.5248        | 1.2828       |        |         |
| <b>Fraction 2-Average</b> | 49.1890        | 1.5089                | 0.5281               | 9.0155           | 34.3644                     | 68.6533      | 6.4881        | 23.3497       | 0.5281        | 0.9053       |        |         |
| <b>Fraction 3-Average</b> | 53.0227        | 0.9429                | 0.3328               | 5.6572           | 36.4947                     | 75.8181      | 8.0976        | 14.6977       | 0.3328        | 1.0538       |        |         |
| <b>Peated-Average</b>     | 60.8889        | 3.1481                | 0.3333               | 5.1852           | 23.0000                     | 76.7037      | 14.5556       | 8.3703        | 0.1852        | 0.1111       |        |         |

**Table S1.** Summary of attributes for the average spectra determined using PyKrev. Assigned formula excludes isotopologues. Mean elemental counts are the average amount per formula. OC and HC are elemental ratios. DBE = Double bond equivalents, AI = Aromaticity index calculated using 'rAImod' in PyKrev. NOSC = Nominal oxidative state of carbon. Lipid, Carbohydrate, Amino sugar, and Oxy-aromatic classes are assigned with MSCC.

| Sample            | Calibration Points | Calibration RMS | Assigned Peaks | Percentage Relative Abundance | Assignment RMS | Contaminants Removed |
|-------------------|--------------------|-----------------|----------------|-------------------------------|----------------|----------------------|
| <b>Spruce low</b> | 27                 | 0.150667        | 3729           | 59.6073                       | 0.12492        | 272                  |

|                            |    |          |      |          |          |     |
|----------------------------|----|----------|------|----------|----------|-----|
| <b>wines-1</b>             |    |          |      |          |          |     |
| <b>Spruce low wines-2</b>  | 22 | 0.138726 | 3071 | 58.2558  | 0.11633  | 272 |
| <b>Spruce low wines-3</b>  | 25 | 0.321008 | 3499 | 59.8082  | 0.12351  | 272 |
| <b>Spruce fraction 1-1</b> | 40 | 0.221830 | 4942 | 40.4059  | 0.13794  | 206 |
| <b>Spruce fraction 1-2</b> | 15 | 0.148770 | 2529 | 50.2861  | 0.12150  | 266 |
| <b>Spruce fraction 1-3</b> | 10 | 0.181170 | 2186 | 48.7416  | 0.13280  | 238 |
| <b>Spruce fraction 2-1</b> | 37 | 0.220510 | 3550 | 35.6446  | 0.14080  | 234 |
| <b>Spruce fraction 2-2</b> | 31 | 0.139983 | 4672 | 45.8117  | 0.13115  | 258 |
| <b>Spruce fraction 2-3</b> | 19 | 0.102657 | 3404 | 33.6696  | 0.11234  | 265 |
| <b>Spruce fraction 3-1</b> | 30 | 0.135771 | 3870 | 31.8047  | 0.12782  | 271 |
| <b>Spruce fraction 3-2</b> | 15 | 0.387611 | 2375 | 27.7162  | 0.13162  | 251 |
| <b>Spruce fraction 3-3</b> | 17 | 0.248542 | 2649 | 30.5255  | 0.12399  | 262 |
| <b>Peated-1</b>            | 31 | 0.171134 | 3378 | 69.8346  | 0.12198  | 33  |
| <b>Peated-2</b>            | 28 | 0.129888 | 4393 | 71.1742  | 0.121812 | 33  |
| <b>Peated-3</b>            | 29 | 0.156082 | 5116 | 72.52873 | 0.119098 | 31  |

**Table S2.** Summary of assignments. Calibration points are the number of matched calibration points with the spectrum. RMS = Root Mean Square Error, assigned peaks include isotopologues.

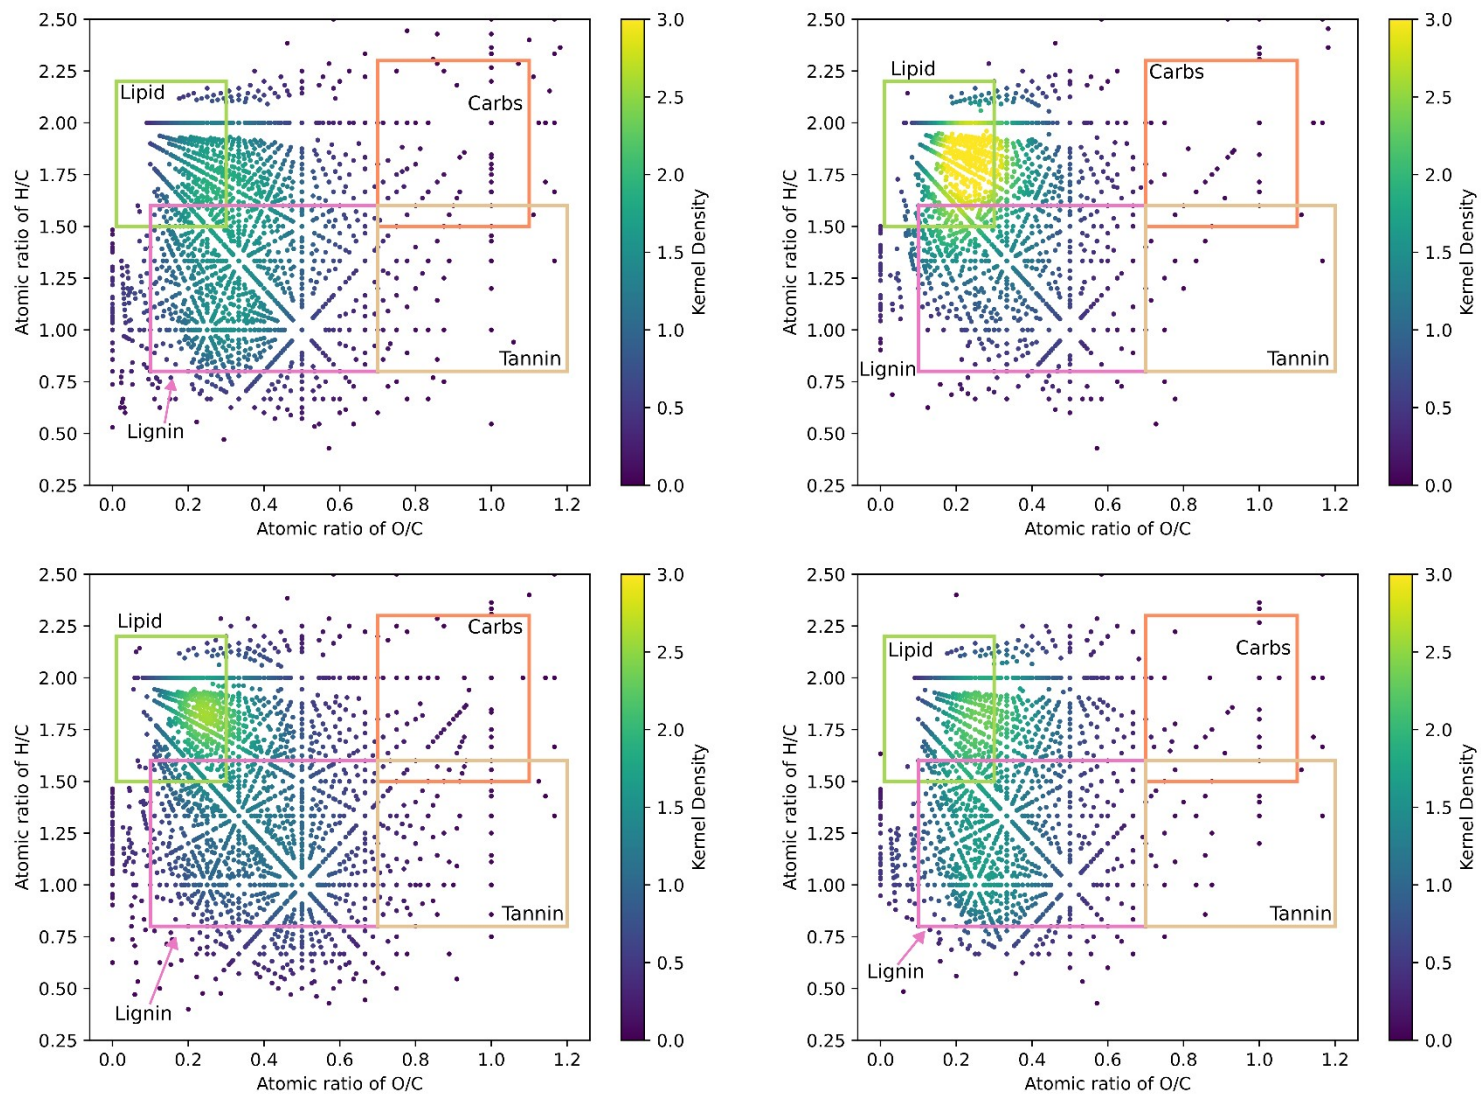

**Figure S1.** Van Krevelen diagrams of spruce smoked low wines (top left) and spruce smoked new make spirit fractions (fraction 1- top right, fraction 2 – bottom left, fraction 3 – bottom right)

## New make spirit production

### Green malt

Green malt used for new make spirit production was supplied by the Scotch Whisky Research Institute. Bulk samples of KWS Sassy barley was steeped and germinated in the laboratory to produce green malt. The steeping and germination conditions are shown in Table S3. After the end of the last germination step the green malt was stored in the freezer.

| Step        | Time (h) | Temperature (°C) |
|-------------|----------|------------------|
| 1st Steep   | 8        | 17               |
| 1st Rest    | 16       | 17               |
| 2nd Steep   | 24       | 17               |
| Germination | 96       | 17               |

**Table S3.** Steeping and germination conditions to produce green malt.

### Malt smoking

Frozen green malt was thawed overnight in a fridge and then allowed to equilibrate to ambient temperature prior to use in smoking experiments. 25 g of peat (provided by a maltster who had sourced it from Bowmore, Islay) or spruce wood chippings was used to smoke 250g of green malt until smoking was complete (0.5 h) using a Carbolite EHA 12/150B horizontal tube oven (Fig. S2). Peat or spruce samples were placed inside the oven via a quartz glass sample boat. The oven has been modified at the chimney end to have a 90° elbow pipe attached to a quartz glass tube which holds the green malt. Air passes into the system via an air inlet from a benchtop air tap. The flow of air can be controlled from this tap and is measured by using an anemometer. The combustions were carried out at the same settings across all smokings; 600°C with an air flow of 2.8 m/s. Once the green malt samples had been smoked they were kilned at 50°C for 24hr. To produce enough malt for processing into spirit in duplicate, these smokings were carried out a total of 8 times for the laboratory spruce smoked malt, and the laboratory peated malt.

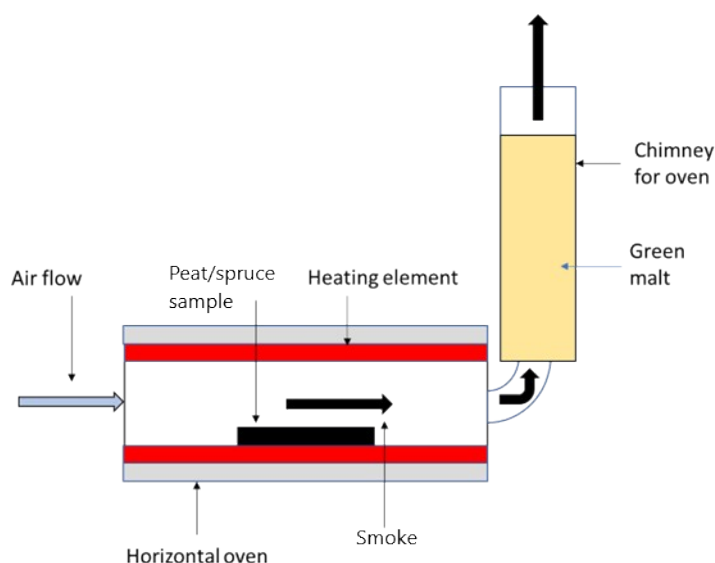

**Figure S2.** Diagram of the SWRI laboratory scale smoking apparatus.

### Mashing

A 128 g sample of malt was weighed into a milling beaker and milled using a Buhler Miag Universal Laboratory Disc Mill (Buhler GmbH, Braunschweig, Germany, Postfach 3369, D-38023) set at 0.2 mm gap width using a feeler gauge. The resultant grist was immediately placed into a tared container and 125 g ( $\pm 0.001$  g) weighed out. This process was repeated four times to obtain a total of 500 g of grist from each malt sample.

Each 125 g aliquot of grist was transferred as quantitatively as possible to a mashing beaker and placed in a 1-Cube R8 Mashing Bath at 65 °C. Distilled water was heated to 68 °C and 325 mL added to the grist in the mashing beaker, carefully rinsing any excess flour in the grist container. Each mash was stirred thoroughly using a glass rod to eliminate any lumps and covered with aluminium foil. The mash temperature was maintained at 65 °C for 1 h with regular stirring.

The mash was then transferred to a polypropylene centrifuge bottle and spun at 1200 g (2000 rpm) for 6 min in a Sanyo MSE Mistral 3000E centrifuge (MSE (UK) Limited, London, UK, SE26 5AZ). The supernatant was decanted and filtered under vacuum through a Buchner filter fitted with an unbleached Classic Calico cotton filter (John Lewis plc., London, UK, SW1E 5NN) into a 2-L Buchner flask. The residual grains were then transferred to the filter funnel and filtered under vacuum to apparent dryness. A glass reagent bottle stopper was used to tamp down the bed and maintain the vacuum. The resulting filtrate was cooled to ambient temperature and transferred to a 3L round bottom flask. The dried grains were returned to the mashing beaker and placed in the water bath which had been heated to 80 °C. The centrifuge bottle was rinsed with 200 mL boiling distilled water and the hot washings added to the grains as second water. The grains were extracted at 80 °C for 30 min, and then filtered under vacuum through the Buchner apparatus as described previously. The resulting filtrate was cooled and added to the 3L round bottom flask. The grains were returned to the mashing beaker and the beaker placed in a water bath at 100 °C and allowed to equilibrate for 5 min. Subsequently, 150 mL boiling water was added to the grains and extracted at 100 °C for 10 min. The grains were then filtered as quickly as possible in order to maximise elution of wort sugars before cooling. An appropriate volume was added to the wort in the fermenter in order to achieve a total wort volume of 2200 mL.

### **Fermentation**

Once all the wort had been collected, 8.00 g of caked M-type distillers yeast from Kerry Biosciences (Kerry Group, Tralee, County Kerry, Ireland, V92 EH11) was pitched into the wort to give an expected pitching rate of  $1-2 \times 10^7$  cells/mL. The fermentation flask was then sealed with a fermentation lock and placed in a water bath with a temperature programme rising from 19 °C to 33 °C over 72 hours. The resulting wash was frozen until distillation. Fermentation for each sample was performed in duplicate.

### **Distillation**

The fermented wash was distilled using lab-scale copper stills as previously described in detail by Harrison et al.<sup>1</sup> Prior to distillation, the frozen wash was rapidly thawed in a sink of hot water. The still was then charged with 1.65 L of wash and 550 mL of low wines were collected. 50 mL of the low wines was retained for analysis. The remaining 500 mL was charged to the spirit still and the following cut-points were used; 3 consecutive 100 mL new make spirit fractions. For the wash distillation, 10 drops of Foamdoctor F2887 were added to the still to reduce foaming. Distillation for each sample was performed in duplicate.

## TGA

### Samples

| Sample | Mass/ mg   | Temperature program | N <sub>2</sub> flow      |
|--------|------------|---------------------|--------------------------|
| PI001  | 82.7079 mg | (10)800[10](10)RT   | 100 cm <sup>3</sup> /min |
| PA001  | 93.5400 mg | (10)800[10](10)RT   | 100 cm <sup>3</sup> /min |
| SB001  | 39.9144 mg | (10)800[10](10)RT   | 100 cm <sup>3</sup> /min |
| SNB001 | 43.2736 mg | (10)800[10](10)RT   | 100 cm <sup>3</sup> /min |

**Table S4.** TGA sample details.

## Graphs

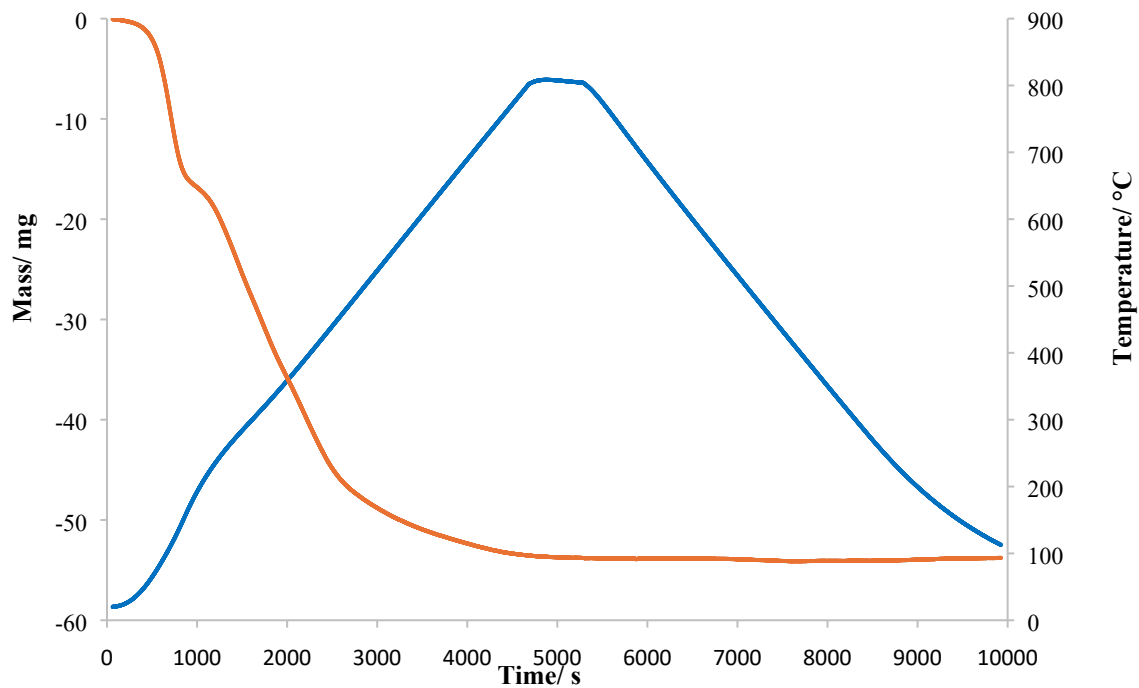

Figure S3. Islay peat TGA mass lost and temperature against time.

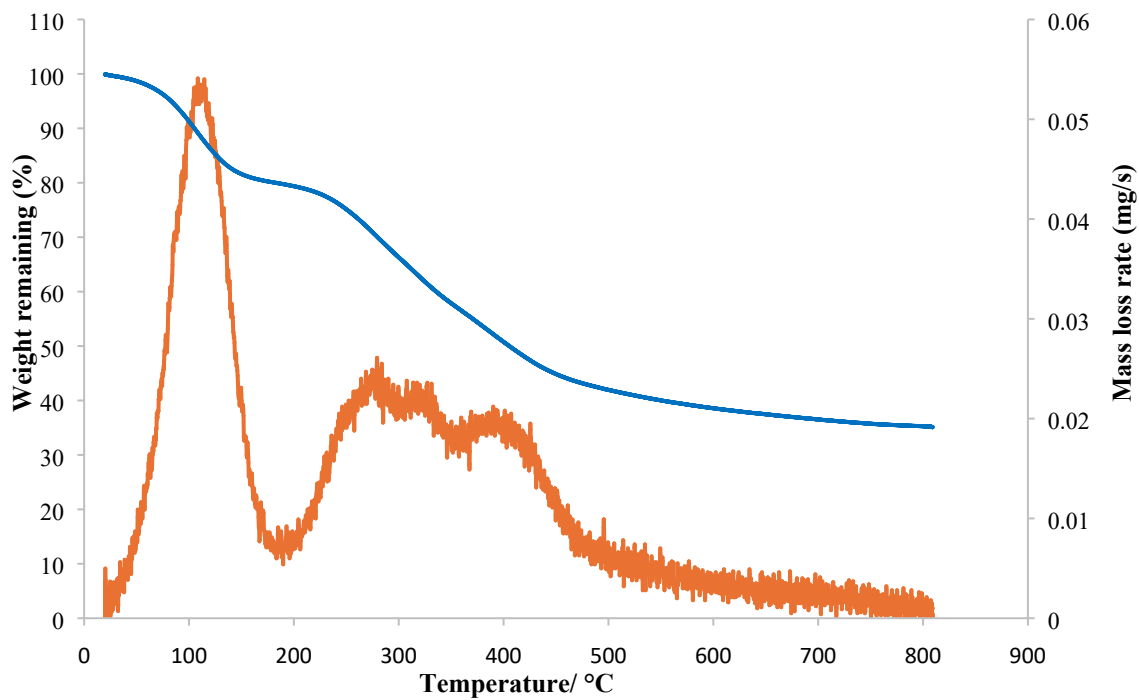

Figure S4. Islay peat TGA weight remaining and mass loss rate against temperature.

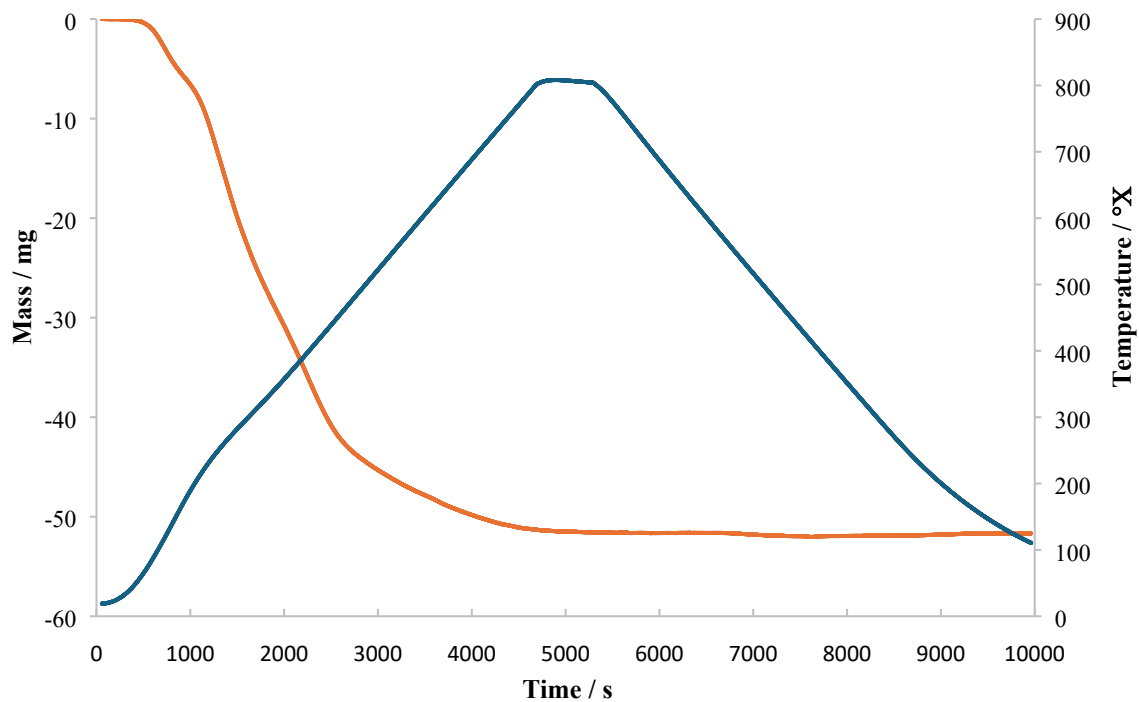

Figure S5. Aberdeen peat TGA mass lost and temperature against time.

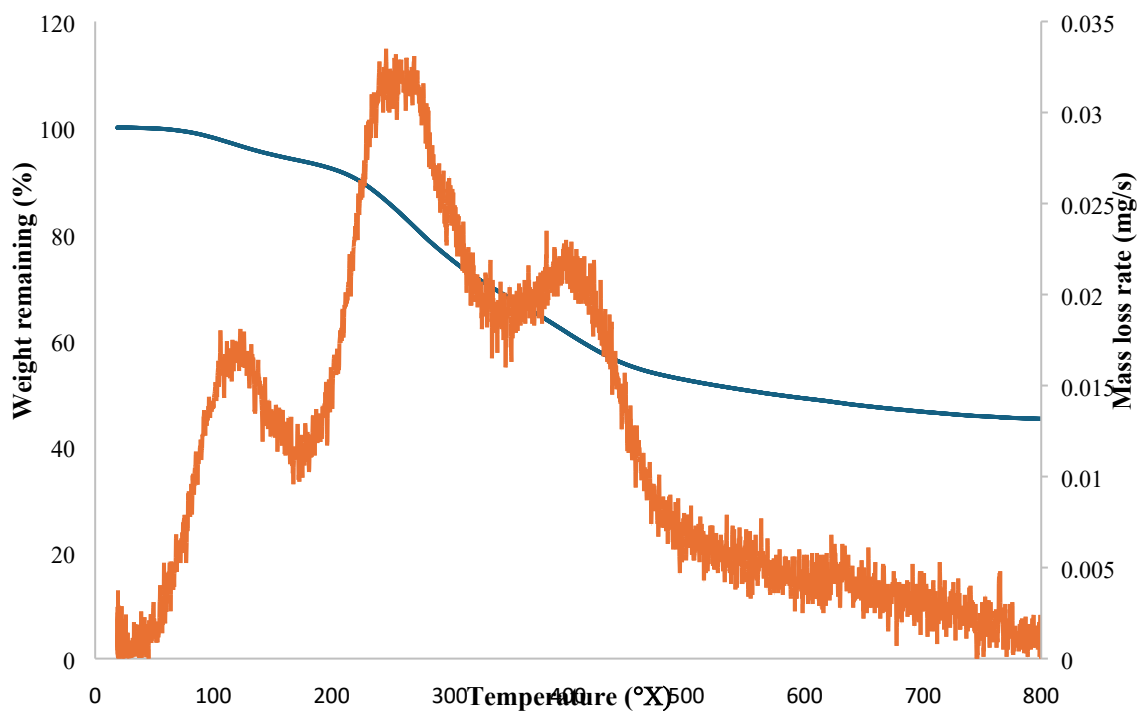

Figure S6. Aberdeen peat TGA weight remaining and mass loss rate against temperature.

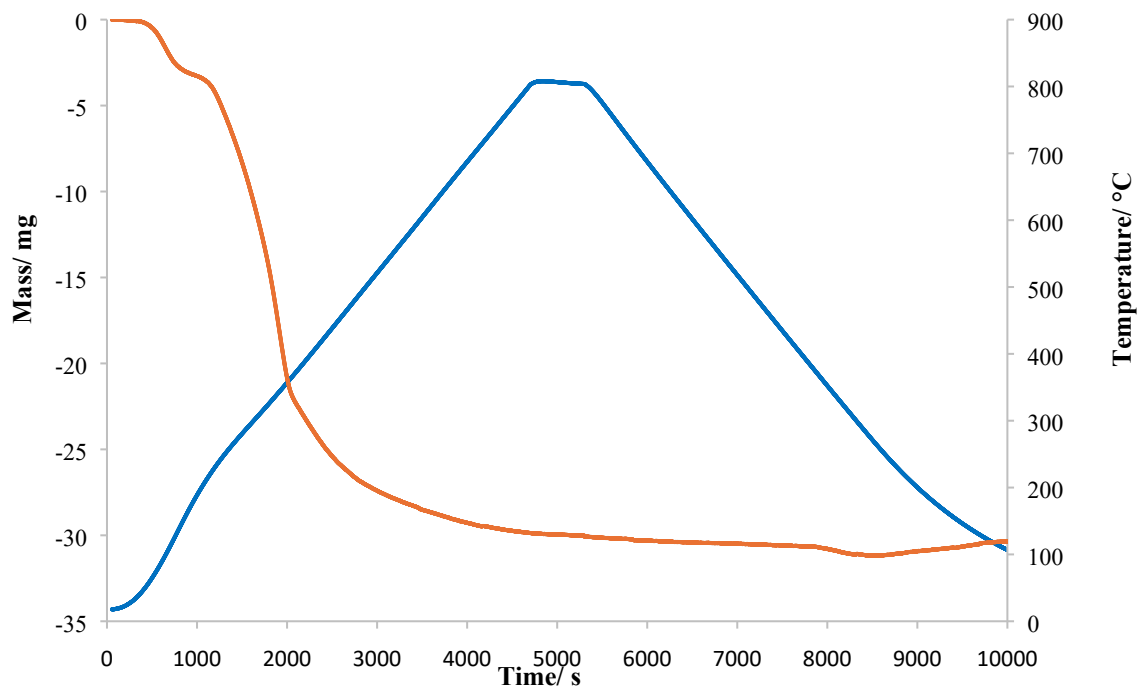

Figure S7. Spruce with bark TGA mass lost and temperature against time.

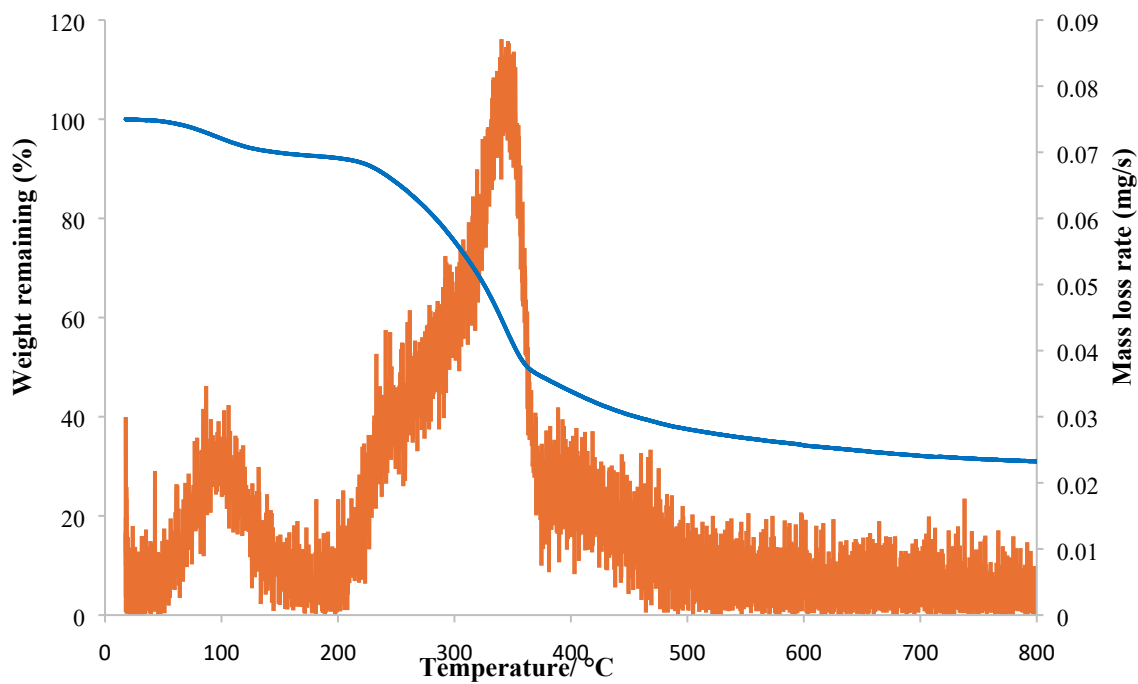

Figure S8. Spruce with bark TGA weight remaining and mass loss rate against temperature.

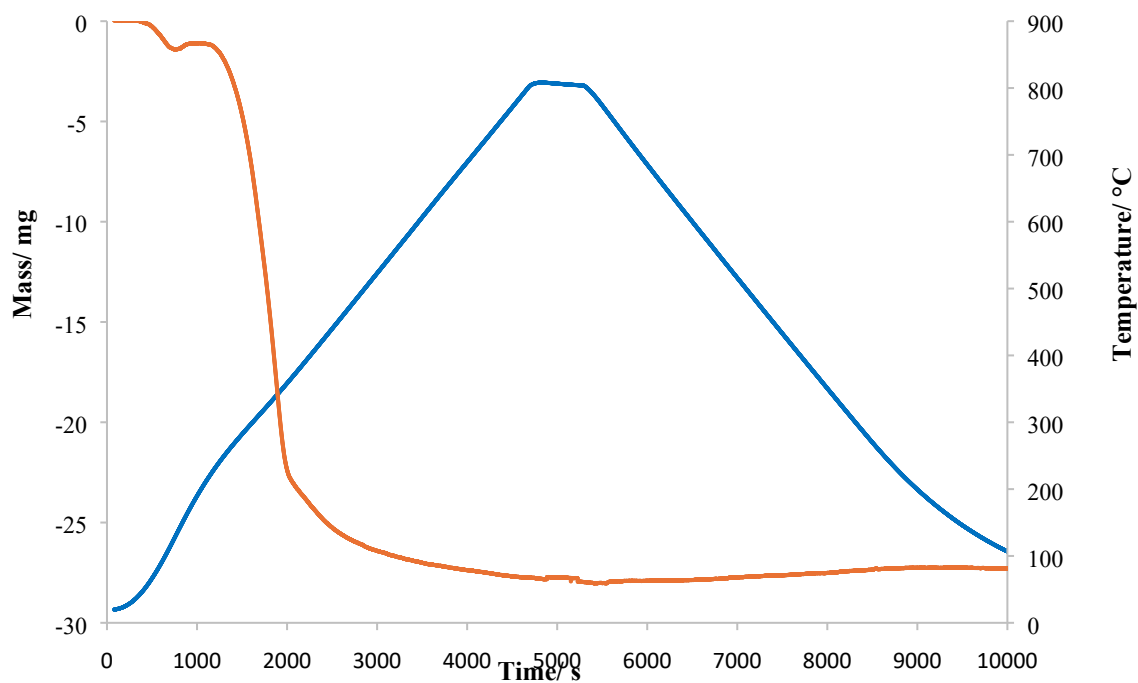

Figure S9. Spruce without bark TGA mass lost and temperature against time.

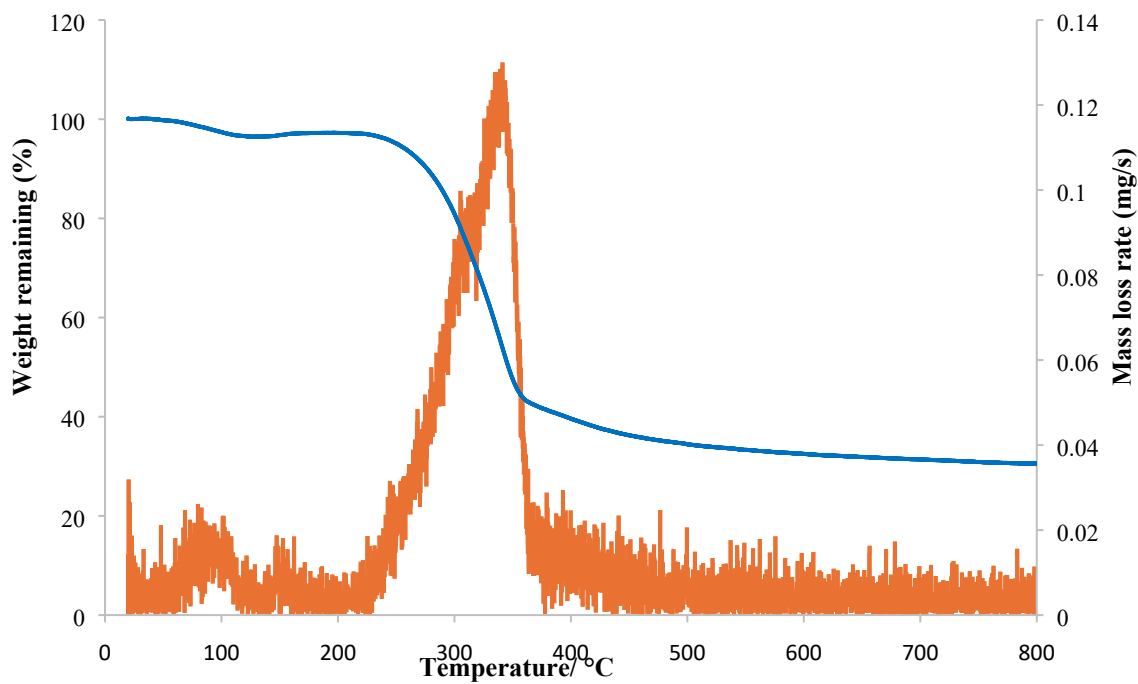

Figure S10. Spruce without bark TGA weight remaining and mass loss rate against temperature.

## PyGCMS

### Samples

| Sample | Mass/ mg | Pyrolysis temperature/ °C | Description                     |
|--------|----------|---------------------------|---------------------------------|
| PI1    | 0.533    | 550                       | Islay peat, 1:250 split         |
| PA4    | 0.520    | 550                       | Aberdeenshire peat, 1:100 split |
| SB2    | 0.521    | 550                       | Spruce with bark, 1:250 split   |
| SNB2   | 0.494    | 550                       | Spruce no bark, 1:250 split     |

Table S5. PyGCMS sample details.

### Signal assignments

| RT/min | Name                                           | m/z          | Molecular Weight |
|--------|------------------------------------------------|--------------|------------------|
| 1.55   | Carbon dioxide                                 | 44           | 44               |
| 1.81   | Acetic acid                                    | 43,44,45,60  | 60               |
| 1.94   | Hydroxyacetone                                 | 43,44        | 74               |
| 2.25   | Unknown                                        | 67,79        | -                |
| 2.35   | Toluene                                        | 91,92        | 92               |
| 2.48   | 2(3H)-Furanone                                 | 84,54        | 84               |
| 2.71   | Furfural                                       | 95,96        | 96               |
| 3.10   | <i>n</i> -C9 Alkene                            | 56,55,126*   | 126              |
| 3.20   | Styrene                                        | 104,103      | 104              |
| 3.49   | 1,2-Cyclopentanedione                          | 98,55        | 98               |
| 3.65   | 2-Pentenoic acid, 3-methyl-2,5-furandione      | 55,68,100,39 | 100, 112         |
| 3.86   | 5-Methylfurfural                               | 110,109      | 110              |
| 4.02   | C <sub>5</sub> H <sub>6</sub> N <sub>2</sub> O | 110,68       | 110              |
| 4.08   | Phenol                                         | 94,66        | 94               |
| 4.27   | 4-Hydroxy-5,6-(2H)-pyran-2-one                 | 114,58       | 114              |
| 4.45   | Unknown                                        | 107,95       | -                |
| 4.51   | Unknown                                        | 112,52       | -                |
| 4.65   | Corylone                                       | 112,69       | 112              |
| 4.77   | Dianhydrorhamnose                              | 128,113      | 128              |
| 4.86   | Indene                                         | 115,116      | 116              |
| 4.96   | <i>o</i> -Cresol                               | 108,107      | 108              |
| 5.13   | Acetophenone                                   | 105,77       | 120              |
| 5.21   | <i>p</i> -Cresol                               | 107,108      | 108              |
| 5.34   | <i>n</i> -C11 Alkene, Furaneol                 | 43,55,128*   | 154, 128         |
| 5.40   | Guaiacol                                       | 109,124      | 124              |
| 5.61   | 2,6-Xylenol                                    | 122,107      | 122              |
| 5.66   | 2-Methylbenzofuran                             | 131,132      | 132              |
| 5.77   | Maltol                                         | 126,71       | 126              |
| 6.06   | Benzyl nitrile                                 | 117,90       | 117              |
| 6.16   | 2,5-Xylenol                                    | 122,107      | 122              |
| 6.20   | Unknown                                        | 115,130      | -                |
| 6.31   | Methylindene                                   | 130,115      | 130              |
| 6.42   | 4-Ethylphenol                                  | 107,122      | 122              |
| 6.57   | Octanoic acid                                  | 60,73        | 144              |

|       |                                                                            |               |          |
|-------|----------------------------------------------------------------------------|---------------|----------|
| 6.65  | <i>n</i> -C12 Alkene                                                       | 41,55         | 168      |
| 6.78  | 4-Methylguaiacol                                                           | 138,123       | 138      |
| 6.87  | 3,5-Dihydroxy-2-methyl-4H-pyran-4-one                                      | 142,68        | 142      |
| 7.12  | 1,4:3,6-Dianhydro- $\alpha$ -D-glucopyranose, 2-hydroxymethylcyclohexanone | 110,69        | 144, 128 |
| 7.17  | 4-Vinylphenol                                                              | 120,91        | 120      |
| 7.38  | 4-Ethyl-2-methylphenol                                                     | 121,136       | 136      |
| 7.53  | Unknown                                                                    | 134,104       | -        |
| 7.63  | Hexylbenzene                                                               | 91,92,162*    | 162      |
| 7.74  | Unknown                                                                    | 105,152       | -        |
| 7.81  | Methoxyprocatechol                                                         | 140,125       | 140      |
| 7.85  | Unknown                                                                    | 129,140       | -        |
| 7.94  | 4-Ethylguaiacol                                                            | 137,152       | 152      |
| 8.01  | <i>n</i> -C13 Alkene                                                       | 41,55,182*    | 182      |
| 8.05  | 1-Indanone                                                                 | 104,132       | 132      |
| 8.12  | <i>n</i> -C13 Alkane                                                       | 57,71,184*    | 184      |
| 8.21  | Unknown                                                                    | 117,142,141   | -        |
| 8.43  | 4-Vinylguaiacol                                                            | 150,135       | 150      |
| 8.54  | Unknown                                                                    | 138,144       | -        |
| 8.62  | Unknown                                                                    | 43,97         | -        |
| 8.83  | 4-Allylphenol                                                              | 133,134       | 134      |
| 8.92  | Syringol                                                                   | 154,139       | 154      |
| 8.98  | Eugenol                                                                    | 164,149       | 164      |
| 9.02  | 2-Benzyl-3-hydroxybutanoic acid                                            | 91,92         | 194      |
| 9.05  | Unknown (likely 2 compounds)                                               | 131,132       | -        |
| 9.10  | 4-Propylguaiacol                                                           | 137,105       | 166      |
| 9.13  | Unknown                                                                    | 154,139       | -        |
| 9.17  | Unknown                                                                    | 191           | -        |
| 9.22  | Aliphatic compound                                                         | 81,55         | -        |
| 9.33  | <i>n</i> -C14 Alkene                                                       | 83,55         | 196      |
| 9.43  | <i>n</i> -C14 Alkane, 5-Methyl-1H-indole                                   | 57,71,130,131 | 198,131  |
| 9.49  | <i>cis</i> -Isoeugenol                                                     | 164,149       | 164      |
| 9.57  | Unknown                                                                    | 123,164       | -        |
| 9.65  | Vanillin                                                                   | 151,152       | 152      |
| 9.90  | Dimethylnaphthalene                                                        | 156,141       | 156      |
| 10.15 | 4-Methylsyringol                                                           | 168,153       | 168      |
| 10.20 | <i>trans</i> -Isoeugenol                                                   | 164,149       | 164      |
| 10.30 | Unknown (likely 2 compounds)                                               | 55,41,141,156 | -        |
| 10.40 | Unknown                                                                    | 107,146       | -        |
| 10.50 | Aliphatic compound                                                         | 55,41         | -        |
| 10.60 | <i>n</i> -C15 Alkene                                                       | 83,97         | 210      |
| 10.69 | <i>n</i> -C15 Alkane                                                       | 57,71         | 212      |
| 10.76 | Apocynin                                                                   | 166,151       | 166      |
| 10.89 | Unknown                                                                    | 121,95        | -        |
| 11.02 | Unknown                                                                    | 161,107       | -        |
| 11.10 | Unknown                                                                    | 173,168       | -        |

|       |                                        |            |     |
|-------|----------------------------------------|------------|-----|
| 11.13 | 3,4,5-Trimethoxytoluene                | 182,167    | 182 |
| 11.27 | Guaiacylacetone                        | 137,180    | 180 |
| 11.62 | 3',5'-Dimethoxyacetophenone            | 180,165    | 180 |
| 11.81 | <i>n</i> -C16 Alkene                   | 97,83      | 224 |
| 11.90 | <i>n</i> -C16 Alkane                   | 57,71      | 226 |
| 11.96 | Trimethylnaphthalene                   | 155,170    | 170 |
| 12.55 | Levoglucosan                           | 60,73      | 162 |
| 12.82 | Decylbenzene                           | 92,91,218* | 218 |
| 12.97 | <i>n</i> -C17 Alkene                   | 97,83      | 238 |
| 13.05 | <i>n</i> -C17 Alkane                   | 57,71      | 240 |
| 13.21 | <i>trans</i> -4-Propenylsyringol       | 194,179    | 194 |
| 13.39 | Unknown                                | 69,186     | -   |
| 13.53 | Aliphatic compound                     | 83,97      | -   |
| 13.65 | 4'-Hydroxy-3',5'-dimethoxyacetophenone | 196,181    |     |
| 13.77 | Acetophenone                           | 181,196    | 196 |
| 13.81 | Tetradecanoic acid                     | 73,60,228* | 228 |
| 13.98 | Undecylbenzene                         | 92,91,232* | 232 |
| 14.03 | Desaspidinol                           | 167,210    | 210 |
| 14.06 | <i>n</i> -C18 Alkene                   | 97,83      | 252 |
| 14.13 | <i>n</i> -C18 Alkane                   | 57,71      | 254 |
| 14.18 | Unknown                                | 178,58     | -   |
| 15.11 | <i>n</i> -C19 Alkene                   | 97,83      | 266 |
| 15.17 | <i>n</i> -C19 Alkane                   | 57,71      | 268 |
| 15.89 | Hexadecanoic acid                      | 73,60      | 256 |
| 16.11 | <i>n</i> -C20 Alkene                   | 97,83      | 280 |
| 16.17 | <i>n</i> -C20 Alkane                   | 57,71      | 282 |
| 17.06 | <i>n</i> -C21 Alkene                   | 97,83      | 294 |
| 17.12 | <i>n</i> -C21 Alkane                   | 57,71      | 296 |
| 17.71 | Octadecanoic acid                      | 73,60      | 284 |
| 17.88 | <i>n</i> -C22 Alkene                   | 97,83      | 308 |
| 17.91 | <i>n</i> -C22 Alkane                   | 57,71      | 310 |
| 18.48 | <i>n</i> -C23 Alkene                   | 97,83      | 322 |
| 18.51 | <i>n</i> -C23 Alkane                   | 57,71      | 324 |
| 18.96 | <i>n</i> -C24 Alkene                   | 97,83      | 336 |
| 19.37 | <i>n</i> -C25 Alkene                   | 97,83      | 350 |
| 19.73 | <i>n</i> -C26 Alkene                   | 97,83      | 364 |
| 20.10 | <i>n</i> -C27 Alkene                   | 97,83      | 378 |
| 20.43 | <i>n</i> -C28 Alkene                   | 97,83      | 392 |
| 20.81 | <i>n</i> -C29 Alkene                   | 97,83      | 406 |
| 21.20 | <i>n</i> -C30 Alkene                   | 97,83      | 420 |

**Table S6.** Compounds identified in Islay peat pyrogram obtained at 550 °C. \*Ions with low intensity important for compound identification.

| RT/min | Name           | m/z   | Molecular Weight |
|--------|----------------|-------|------------------|
| 1.86   | Carbon dioxide | 44    | 44               |
| 1.95   | Unknown        | 43,39 | -                |
| 2.00   | Acetic acid    | 43,45 | 60               |

|      |                                   |            |        |
|------|-----------------------------------|------------|--------|
| 2.06 | 3-Methylfuran                     | 82,81      | 82     |
| 2.16 | Hydroxyacetone                    | 43,74      | 74     |
| 2.27 | 2,5-Dimethylfuran                 | 96,95      | 96     |
| 2.42 | Pyridine                          | 79,52      | 79     |
| 2.53 | Toluene                           | 91,92      | 92     |
| 2.62 | 2(3H)-Furanone                    | 84,54      | 84     |
| 2.71 | 3-Furaldehyde                     | 95,96      | 96     |
| 2.75 | 2-Methylpyridine                  | 93,66      | 93     |
| 2.83 | Furfural                          | 95,96      | 96     |
| 3.03 | 2-Propylfuran                     | 81,53,110  | 110    |
| 3.05 | Unknown                           | 34,44,98   | -      |
| 3.14 | <i>p</i> -Xylene                  | 91,106     | 106    |
| 3.17 | Cyclopent-4-ene-1,3-dione         | 96,68      | 96     |
| 3.22 | <i>n</i> -C9 Alkene               | 43,56      | 126    |
| 3.30 | Styrene                           | 104,103    | 104    |
| 3.32 | Unknown                           | 91,100     | -      |
| 3.38 | 2(5H)-Furanone, Acetylfuran       | 95,55      | 84,110 |
| 3.45 | Unknown                           | 70,42      | -      |
| 3.50 | 1,2-Cyclopentanedione             | 98,40      | 98     |
| 3.63 | 5,6-Dihydro-2H-pyran-2-one        | 68,39      | 98     |
| 3.77 | Unknown                           | 57,43      | -      |
| 3.88 | Hexahydro-3,6-pyridazinedione     | 55,86      | 114    |
| 3.98 | Phenol                            | 94,66      | 94     |
| 4.05 | 6-Methyl-4(1H)-Pyrimidinone       | 110,40     | 110    |
| 4.12 | Unknown                           | 97,105     | -      |
| 4.16 | <i>n</i> -C10 Alkene              | 41,56      | 140    |
| 4.22 | $\alpha$ -Acetobutyrolactone      | 43,86      | 128    |
| 4.27 | Unknown                           | 114,58     | -      |
| 4.36 | 1H-Pyrrole-2-carboxaldehyde       | 95,56      | 95     |
| 4.42 | Corylone                          | 112        | 112    |
| 4.48 | Unknown                           | 52,110     | -      |
| 4.54 | 3-Methyl-1,2-cyclopentanedione    | 112,69     | 112    |
| 4.79 | Dianhydrorhamnose                 | 58,113,128 | 128    |
| 4.82 | <i>o</i> -Toluidine               | 91         | 107    |
| 4.86 | <i>o</i> -Cresol                  | 108,107    | 108    |
| 4.91 | Indene                            | 115,116    | 116    |
| 4.99 | Unknown                           | 60,91      | -      |
| 5.11 | <i>p</i> -Cresol                  | 107,108    | 108    |
| 5.17 | 2,5-Furandicarboxaldehyde         | 124,123    | 124    |
| 5.30 | Furaneol                          | 43,128     | 128    |
| 5.34 | Guaiacol                          | 109,124    | 124    |
| 5.46 | <i>n</i> -C11 Alkane              | 57,43      | 156    |
| 5.64 | Maltol                            | 126,71     | 126    |
| 5.69 | 2-Methylbenzofuran                | 131,132,95 | 132    |
| 5.77 | Cyclopent-4-ene-1,3-dione         | 96,40      | 96     |
| 5.81 | 4-Piperidone                      | 99,57      | 99     |
| 5.92 | 5-Hydroxy-2-methyl-4H-pyran-4-one | 126,69     | 126    |
| 6.02 | 2H-Pyran-2-one                    | 96,40      | 96     |
| 6.08 | 2,5-Xylenol                       | 107,122    | 122    |

|       |                                              |             |         |
|-------|----------------------------------------------|-------------|---------|
| 6.30  | 4-Ethylphenol                                | 107,122     | 122     |
| 6.37  | Unknown                                      | 57,73       | -       |
| 6.58  | 3,5-Dihydroxy-2-methyl-4H-pyan-4-one         | 142,68      | 142     |
| 6.67  | Catechol                                     | 110,64      | 110     |
| 6.70  | 4-Methylguaiacol                             | 123,138     | 138     |
| 6.79  | <i>n</i> -C12 Alkane                         | 57,43       | 170     |
| 6.83  | Unknown                                      | 114,55      | -       |
| 6.87  | 6-Methyl-3-pyridinol                         | 109,81      | 109     |
| 7.01  | 4-Vinylphenol                                | 120,91      | 120     |
| 7.09  | 5-Hydroxymethylfurfural                      | 97,126      | 126     |
| 7.23  | 3,4-Anhydro-d-galactosan                     | 69,71       | 144     |
| 7.28  | 4-Ethyl-2-methylphenol                       | 121,136     | 136     |
| 7.34  | Unknown                                      | 113,114     | -       |
| 7.44  | <i>cis</i> -1,2-Cyclohexanediol              | 42,43,116*  | 116     |
| 7.58  | Cellulose degradation product                | 57,73       | -       |
| 7.85  | 4-Ethylguaiacol                              | 137,110,152 | 152     |
| 7.96  | 4-Methylcatechol                             | 124,78      | 124     |
| 8.02  | <i>n</i> -C13 Alkene                         | 41,55       | 182     |
| 8.14  | Indole, <i>n</i> -C13 Alkane                 | 117,57      | 117,184 |
| 8.20  | 2-Hydroxy-6,8-dioxabicyclo[3.2.1]octan-4-one | 87,144      | -       |
| 8.34  | 2-Methoxy-4-vinylphenol                      | 150,135     | 150     |
| 8.69  | 4-Allylphenol                                | 134,133     | 134     |
| 8.79  | Syringol                                     | 154,139     | 154     |
| 8.89  | Eugenol                                      | 164,74      | 164     |
| 8.94  | Unknown                                      | 121,154     | -       |
| 9.09  | 1,2,3-Benzenetriol                           | 126,74      | 126     |
| 9.20  | Anhydrocarbohydrate                          | 60,73       | -       |
| 9.35  | <i>n</i> -C14 Alkene                         | 55,41       | 196     |
| 9.47  | Vanillin                                     | 151,152     | 152     |
| 9.57  | 2-Methyl-5-hydroxybenzofuran                 | 147,148     | 148     |
| 9.71  | Inositol                                     | 73          | 180     |
| 9.75  | 2-Methyl-5-hydroxybenzofuran                 | 147,148     | 148     |
| 9.79  | Unknown                                      | 57,71       | -       |
| 9.96  | Acetophenone                                 | 121,136     | 136     |
| 10.01 | 4-Methylsyringol                             | 168,153     | 168     |
| 10.09 | Anhydrocarbohydrate                          | 60,73       | -       |
| 10.12 | <i>trans</i> -Isoeugenol                     | 60,164      | 164     |
| 10.39 | <i>n</i> -C15 Alkene                         | 55,41       | 210     |
| 10.56 | Apocynin                                     | 151,166     | 166     |
| 10.89 | Levoglucosan                                 | 60,73       | 162     |
| 11.06 | Guaiacylacetone                              | 137,180     | 180     |
| 11.24 | Unknown                                      | 43,60       | -       |
| 11.43 | 3-Hydroxy-4-methoxybenzoic acid              | 168,153     | 168     |
| 11.48 | 3',5'-Dimethoxyacetophenone                  | 180,165     | 180     |
| 11.76 | Butyrovaniellone                             | 151,123     | 194     |
| 11.83 | <i>n</i> -C16 Alkene                         | 55,43       | 224     |
| 11.92 | 1,6-Anhydro- $\beta$ -D-glucofuranose        | 73,43       | 162     |

|       |                                          |            |     |
|-------|------------------------------------------|------------|-----|
| 11.95 | 1,6-Anhydro- $\alpha$ -D-galactofuranose | 73,69      | 162 |
| 12.58 | Syringaldehyde                           | 182,181    | 182 |
| 12.82 | Tetrahydroactinidiolide                  | 43,57      | 182 |
| 12.88 | 5-Ethynyl-1,2,3-trimethoxybenzene        | 192,177    | 192 |
| 12.98 | <i>n</i> -C17 Alkene                     | 55,83      | 238 |
| 13.06 | <i>n</i> -C17 Alkane                     | 57,71      | 240 |
| 13.27 | Unknown                                  | 186,93     | -   |
| 13.36 | Unknown                                  | 56,57      | -   |
| 13.40 | Acetosyringone                           | 181,196    | 196 |
| 13.52 | Coniferyl alcohol                        | 137,180    | 180 |
| 13.67 | Tetradecanoic acid                       | 73,60      | 228 |
| 13.75 | Desapidinol                              | 167,210    | 210 |
| 13.99 | Unknown                                  | 91,92      | -   |
| 14.07 | <i>n</i> -C18 Alkene                     | 83,97      | 252 |
| 14.14 | <i>n</i> -C18 Alkane                     | 57,71      | 254 |
| 15.11 | <i>n</i> -C19 Alkene                     | 83,97      | 266 |
| 15.18 | <i>n</i> -C19 Alkane                     | 57,71      | 268 |
| 16.11 | <i>n</i> -C20 Alkene                     | 83,97      | 280 |
| 16.17 | <i>n</i> -C20 Alkane                     | 57,71      | 282 |
| 17.05 | <i>n</i> -C21 Alkene                     | 83,97      | 294 |
| 17.11 | <i>n</i> -C21 Alkane                     | 57,71      | 296 |
| 17.81 | <i>n</i> -C22 Alkene                     | 83,97      | 308 |
| 17.84 | <i>n</i> -C22 Alkane                     | 57,71      | 310 |
| 18.34 | <i>n</i> -C23 Alkene                     | 83,97      | 322 |
| 18.36 | <i>n</i> -C23 Alkene                     | 83,97      | 322 |
| 18.38 | <i>n</i> -C23 Alkane                     | 57,71      | 324 |
| 18.43 | <i>n</i> -C21 Ketone                     | 58,59,310* | 310 |
| 18.80 | <i>n</i> -C24 Alkene                     | 83,97      | 336 |
| 18.82 | <i>n</i> -C24 Alkane                     | 57,71      | 338 |
| 19.17 | <i>n</i> -C25 Alkene                     | 83,97      | 350 |
| 19.51 | <i>n</i> -C26 Alkene                     | 83,97      | 364 |
| 19.86 | <i>n</i> -C27 Alkene                     | 83,97      | 378 |
| 19.92 | Aliphatic ketone                         | 58,59      | -   |
| 20.57 | <i>n</i> -C29 Alkene                     | 83,97      | 392 |
| 20.64 | Aliphatic ketone                         | 58,59      | -   |
| 21.37 | <i>n</i> -Alkane                         | 57,71      | -   |
| 21.50 | Aliphatic ketone                         | 58,59      | -   |

**Table S7.** Compounds identified in Aberdeenshire peat pyrogram obtained at 550 °C. \*Ions with low intensity important for compound identification.

| RT/min | Name           | m/z      | Molecular Weight |
|--------|----------------|----------|------------------|
| 1.54   | Carbon dioxide | 44       | 44               |
| 1.83   | Acetic acid    | 45,43,60 | 60               |
| 1.90   | Hydroxyacetone | 43,74    | 74               |
| 2.36   | Toluene        | 91,92    | 92               |
| 2.45   | 2(3H)-Furanone | 84,54    | 84               |
| 2.69   | Furfural       | 95,96    | 96               |

|      |                                                |             |         |
|------|------------------------------------------------|-------------|---------|
| 2.83 | 2-Furanmethanol                                | 98,97       | 98      |
| 2.87 | Acetoxyacetone                                 | 43,86       | 116     |
| 3.02 | Xylene                                         | 91,106      | 106     |
| 3.10 | Cyclopent-4-ene-1,3-dione                      | 96,68       | 96      |
| 3.18 | Styrene                                        | 104,103     | 104     |
| 3.32 | 2-Ethyl-5-methylfuran                          | 110,95      | 110     |
| 3.40 | 2(5H)-Furanone                                 | 84,55       | 84      |
| 3.52 | 1,2-Cyclopentanedione                          | 98,55       | 98      |
| 3.63 | Unknown                                        | 68,83       | -       |
| 3.77 | Unknown                                        | 57,43       | -       |
| 3.84 | 5-Methylfurfural                               | 109,110     | 110     |
| 4.07 | Phenol                                         | 94,66       | 94      |
| 4.27 | Unknown                                        | 114,58      | -       |
| 4.43 | $\alpha$ -Terpinolene                          | 121,136     | 136     |
| 4.53 | <i>o</i> -Cymene                               | 119,112     | 134     |
| 4.67 | Corylone                                       | 112,55      | 112     |
| 4.77 | Dianhydrhramnose                               | 91,67       | 128     |
| 4.88 | Unknown                                        | 57,69       | -       |
| 4.94 | <i>o</i> -Cresol                               | 108,107     | 108     |
| 5.11 | Cumene                                         | 105,120     | 120     |
| 5.21 | <i>p</i> -Cresol                               | 107,108     | 108     |
| 5.30 | <i>n</i> -C11 Alkene                           | 41,55,154*  | 154     |
| 5.39 | Guaiacol                                       | 124,109     | 124     |
| 5.54 | Unknown                                        | 44,57       | -       |
| 5.64 | 2-Methylbenzofuran                             | 132,131     | 132     |
| 5.80 | Maltol                                         | 126,71      | 126     |
| 6.03 | Benzyl nitrile                                 | 117,90      | 117     |
| 6.16 | 2,5-Xylenol                                    | 107,122     | 122     |
| 6.30 | 3-Hydroxy-4-methylbenzaldehyde, 2-methylindene | 135,136,130 | 136,130 |
| 6.46 | 4-Ethylphenol                                  | 107,122     | 122     |
| 6.55 | Heptanoic acid, Octenoic acid                  | 60,55       | 130,142 |
| 6.63 | <i>n</i> -C12 Alkene                           | 83,97       | 168     |
| 6.77 | 4-Methylguaiacol                               | 123,138     | 138     |
| 7.06 | Catechol                                       | 110,64      | 110     |
| 7.18 | 4-Vinylphenol                                  | 120,91      | 120     |
| 7.32 | 2,3-Dimethoxytoluene                           | 124,152,137 | 152     |
| 7.38 | 4-Ethyl-2-methylphenol                         | 121,136     | 136     |
| 7.58 | Unknown                                        | 97,126      | -       |
| 7.62 | 2-Ethylbenzaldehyde                            | 134,133     | 134     |
| 7.67 | 4-Propylphenol                                 | 107,121,136 | 136     |
| 7.82 | 4-Methylcatechol                               | 124,78      | 124     |
| 7.92 | 4-Ethylguaiacol                                | 137,152     | 152     |
| 7.98 | <i>n</i> -C13 Alkene                           | 83,97       | 182     |
| 8.12 | 2-Allylphenol                                  | 134,133     | 134     |
| 8.21 | 1-Methylnaphthalene, Indole                    | 117,57      | 142,117 |
| 8.32 | 4-Methylcatechol                               | 124,123     | 124     |
| 8.44 | 4-Vinylguaiacol                                | 150,135     | 150     |
| 8.53 | Unknown                                        | 138,109     | -       |

|       |                                          |            |     |
|-------|------------------------------------------|------------|-----|
| 8.80  | 4-Allylphenol                            | 134,133    | 134 |
| 8.98  | Eugenol                                  | 164,149    | 164 |
| 9.09  | 4-Propylguaiacol                         | 137,166    | 166 |
| 9.21  | Bicyclo[3.3.1]nonane                     | 81,124     | 124 |
| 9.31  | <i>n</i> -C14 Alkene                     | 83,97      | 196 |
| 9.41  | 3-Methylindole                           | 130,131    | 131 |
| 9.47  | Unknown                                  | 149,135    | -   |
| 9.56  | Ethylresorcinol                          | 123,138    | 138 |
| 9.63  | <i>cis</i> -Isoeugenol                   | 164,149    | 164 |
| 9.66  | Vanillin                                 | 151,152    | 152 |
| 9.77  | 2-Allyl-4-methylphenol                   | 148,133    | 148 |
| 10.20 | <i>trans</i> -Isoeugenol                 | 164,149    | 164 |
| 10.31 | Unknown                                  | 41,55      | -   |
| 10.39 | Unknown                                  | 107,146    | -   |
| 10.58 | <i>n</i> -C15 Alkene                     | 83,97      | 210 |
| 10.66 | 6-Methoxy-3-methylbenzofuran             | 147,162    | 162 |
| 10.76 | Apocynin                                 | 151,166    | 166 |
| 11.27 | Guaiacylacetone                          | 137,180    | 180 |
| 11.35 | $\alpha$ -Calacorene                     | 157,142    | 200 |
| 11.62 | $\beta$ -Calacorene                      | 157,142    | 200 |
| 11.79 | <i>n</i> -C16 Alkene                     | 83,97      | 224 |
| 11.90 | 1,2-Dimethoxy-4- <i>n</i> -propylbenzene | 151,180    | 180 |
| 11.95 | Butyrovanillone                          | 151,123    | 194 |
| 12.20 | Levoglucosan                             | 60,73      | 162 |
| 12.62 | <i>n</i> -C17 Alkene                     | 83,97      | 238 |
| 12.70 | 4-Hydroxy-3-methoxybenzenepropanol       | 137,182    | 182 |
| 12.80 | <i>n</i> -C17 Alkene                     | 69,83      | 238 |
| 12.86 | 3-Methoxy-2-naphthalenol                 | 174,131    | 174 |
| 12.94 | Unknown                                  | 83,97      | -   |
| 12.99 | Coniferyl alcohol                        | 137,124    | 180 |
| 13.01 | 1'-Hydroxyeugenol                        | 137,124    | 180 |
| 13.15 | Unknown                                  | 137,149    | -   |
| 13.21 | Unknown                                  | 82,43      | -   |
| 13.27 | Aliphatic alkane                         | 57,71      | -   |
| 13.37 | Unknown                                  | 56,69      | -   |
| 13.40 | Unknown                                  | 186,93     | -   |
| 13.61 | Unknown                                  | 70,83      | -   |
| 13.72 | Oplopanone                               | 153,135    | 238 |
| 13.77 | Coniferyl alcohol isomer                 | 137,180    | 180 |
| 13.97 | Unknown                                  | 81,95      | -   |
| 14.05 | <i>n</i> -C18 Alkene                     | 83,97      | 252 |
| 14.11 | <i>n</i> -C18 Alkane                     | 57,71      | 254 |
| 14.54 | Neophytadiene                            | 68,95,278* | 278 |
| 14.62 | Unknown                                  | 43,123     | -   |
| 14.80 | Unknown                                  | 70,55      | -   |
| 14.86 | Pentadecanoic acid                       | 73,60,242* | 242 |
| 14.92 | Unknown                                  | 206,150    | -   |
| 14.99 | Hexadecanol                              | 83,97      | 242 |

|       |                                         |            |     |
|-------|-----------------------------------------|------------|-----|
| 15.09 | <i>n</i> -C19 Alkene                    | 97,83      | 266 |
| 15.15 | <i>n</i> -C19 Alkane                    | 57,71      | 268 |
| 15.23 | Tetradecylfuran                         | 81,95,264* | 264 |
| 15.36 | Unknown                                 | 74,55      | -   |
| 15.73 | Heptadecanol                            | 83,97,256* | 256 |
| 15.91 | Hexadecenoic acid                       | 73,60,256* | 256 |
| 16.09 | <i>n</i> -C20 Alkene                    | 83,97      | 266 |
| 16.24 | Unknown                                 | 239        | -   |
| 16.38 | Unknown                                 | 197,239    | -   |
| 16.55 | Unknown                                 | 239,254    | -   |
| 16.58 | Unknown                                 | 213,185    | -   |
| 16.63 | Kaur-16-ene                             | 55,83      | 272 |
| 16.92 | Epimanol                                | 137,81     | 290 |
| 16.98 | Aliphatic alcohol                       | 83,97      | -   |
| 17.04 | <i>n</i> -C21 Alkene                    | 83,97      | 280 |
| 17.09 | <i>n</i> -C21 Alkane                    | 57,71      | 282 |
| 17.51 | Linoleic acid                           | 81,67      | 280 |
| 17.70 | Octadecanoic acid                       | 73,129     | 284 |
| 17.85 | <i>n</i> -C22 Alkene                    | 83,97      | 294 |
| 17.89 | <i>n</i> -C22 Alkane                    | 57,71      | 296 |
| 17.98 | Unknown                                 | 157,239    | -   |
| 18.05 | Unknown                                 | 254        | -   |
| 18.20 | Unknown                                 | 109,123    | -   |
| 18.45 | <i>n</i> -C23 Alkene                    | 83,97      | 308 |
| 18.49 | <i>n</i> -C23 Alkane                    | 57,71      | 310 |
| 18.56 | Aliphatic ketone                        | 58,59      | -   |
| 18.66 | Unknown                                 | 269,201    | -   |
| 18.74 | Unknown                                 | 83,280     | -   |
| 18.81 | Podocarpa-6,8,11,13-tetraen-15-oic acid | 237,197    | 312 |
| 18.83 | Methyl dehydroabietate                  | 239,240    | 314 |
| 18.88 | Eicosanoic acid                         | 73,43,312* | 312 |
| 18.93 | Unknown                                 | 167,197    | -   |
| 18.94 | <i>n</i> -C24 Alkene                    | 83,97      | 322 |
| 18.98 | Dehydroabietol                          | 253,271    | 286 |
| 19.36 | <i>n</i> -C25 Alkene                    | 83,97      | 336 |
| 19.83 | 7-Oxodehydroabietic acid, Methyl ester  | 253,328    | 328 |
| 20.09 | <i>n</i> -C27 Alkene                    | 83,97      | 364 |
| 20.73 | Unknown                                 | 113,100    | -   |

**Table S8.** Compounds identified in spruce with bark pyrogram obtained at 550 °C. \*Ions with low intensity important for compound identification.

| RT/min | Name                       | m/z      | Molecular Weight |
|--------|----------------------------|----------|------------------|
| 1.55   | Carbon dioxide             | 44       | 44               |
| 1.71   | Unknown                    | 44,31    | -                |
| 1.86   | Acetic acid                | 31,45,60 | 60               |
| 2.01   | Hydroxyacetone             | 43,31,74 | 74               |
| 2.26   | 1,2-Ethandiol, monoacetate | 43,73    | 104              |
| 2.40   | Unknown                    | 58,43    | -                |
| 2.68   | Furfural                   | 95,96    | 96               |

|       |                                            |             |         |
|-------|--------------------------------------------|-------------|---------|
| 2.87  | 2,3-Dihydro-2,5-dimethylfuran              | 43,98       | 98      |
| 3.17  | Styrene                                    | 104,103     | 104     |
| 3.31  | 2,4-Dimethylfuran                          | 67,96       | 96      |
| 3.47  | 2(5H)-furanone                             | 55,84       | 84      |
| 3.56  | 1,2-Cyclopentanedione                      | 98,55       | 98      |
| 3.66  | Unknown                                    | 68,83       | -       |
| 3.88  | 5-Methylfurfural                           | 86,109      | 110     |
| 4.07  | $\alpha$ -Methylstyrene                    | 41,118      | 118     |
| 4.13  | Phenol                                     | 94,66       | 94      |
| 4.33  | Unknown                                    | 114,58      | -       |
| 4.70  | Corylone                                   | 112,69      | 112     |
| 4.82  | Salicylaldehyde                            | 122,121     | 122     |
| 4.96  | <i>o</i> -Cresol                           | 108,107     | 108     |
| 5.25  | <i>p</i> -Cresol                           | 107,108     | 108     |
| 5.29  | <i>n</i> -C11 Alkene                       | 85,41       | 154     |
| 5.40  | Guaiacol                                   | 109,124     | 124     |
| 5.64  | 2,6-Xylenol                                | 44,57,122*  | 122     |
| 5.85  | Maltol                                     | 126,71      | 126     |
| 6.17  | 2,5-Xylenol                                | 107,122     | 122     |
| 6.36  | Unknown                                    | 42,85       | -       |
| 6.49  | 4-Ethylphenol,2,3-dihydroxybenzaldehyde    | 107,138     | 122,138 |
| 6.56  | 5-Methylguaiacol                           | 123,138     | 138     |
| 6.63  | <i>n</i> -C12 Alkene                       | 41,55,168*  | 168     |
| 6.79  | 4-Methylguaiacol                           | 123,138,95  | 138     |
| 6.99  | 5-Hydroxymaltol                            | 142,43      | 142     |
| 7.22  | Catechol                                   | 110,64      | 110     |
| 7.33  | Dimethoxytoluene                           | 152,137     | 152     |
| 7.37  | 4-Ethyl-2-methylphenol                     | 121,136     | 136     |
| 7.72  | 5-Hydroxymethylfurfural                    | 97,126      | 126     |
| 7.93  | 4-Ethylguaiacol                            | 137,152     | 152     |
| 7.99  | <i>n</i> -C13 Alkene                       | 55,83       | 182     |
| 8.09  | <i>n</i> -C13 Alkane                       | 57,71       | 184     |
| 8.14  | <i>p</i> -Isopropenylphenol                | 134,133     | 134     |
| 8.46  | 4-Vinylguaiacol                            | 150,135     | 150     |
| 8.54  | 5-Methyl-2-allylphenol                     | 148,133     | 148     |
| 8.79  | Unknown                                    | 144,87      | -       |
| 9.00  | Eugenol                                    | 164,149     | 164     |
| 9.06  | 8,9-Dehydrothymol methyl ether, 1H-indenol | 132,131,162 | 162,132 |
| 9.11  | 4-Propylguaiacol                           | 137,166     | 166     |
| 9.31  | <i>n</i> -C14 Alkene                       | 83,97       | 196     |
| 9.40  | <i>n</i> -C14 Alkane                       | 57,71       | 198     |
| 9.57  | 4-Ethylcatechol                            | 123,138     | 138     |
| 9.65  | <i>cis</i> -Isoeugenol                     | 164,149     | 164     |
| 9.73  | Vanillin                                   | 151,152     | 152     |
| 9.80  | 6-Allyl- <i>o</i> -cresol                  | 148,133     | 148     |
| 10.23 | <i>trans</i> -Isoeugenol                   | 164,149     | 164     |
| 10.43 | Propylguaiacol isomer                      | 137,166     | 166     |
| 10.58 | <i>n</i> -C15 Alkene                       | 83,97       | 210     |

|       |                                                                  |            |         |
|-------|------------------------------------------------------------------|------------|---------|
| 10.67 | <i>n</i> -C15 Alkane,6-methoxy-3-methylbenzofuran                | 147,162,57 | 212,162 |
| 10.82 | Apocynin                                                         | 151,166    | 166     |
| 10.99 | 4-Hydroxy-3-propylbenzoic acid                                   | 151,180    | 180     |
| 11.09 | 4-Hydroxy-3-methoxybenzoic acid, methyl ester                    | 151,182    | 182     |
| 11.32 | Guaiacylacetone                                                  | 137,180    | 180     |
| 11.38 | Unknown                                                          | 131,178    | -       |
| 11.80 | <i>n</i> -C16 Alkene                                             | 83,97      | 224     |
| 11.82 | 1'-Hydroxyeugenol                                                | 137,180    | 180     |
| 11.87 | <i>n</i> -C16 Alkane                                             | 57,71      | 226     |
| 11.92 | 1-(2-hydroxy-4-methoxyphenyl)propan-1-one                        | 151,180    | 180     |
| 11.97 | Butyrovanillone                                                  | 151,123    | 194     |
| 12.73 | 4-Hydroxy-3-methoxybenzenepropanol                               | 137,182    | 182     |
| 12.86 | Levoglucosan                                                     | 60,57      | 162     |
| 12.94 | <i>n</i> -C17 Alkene                                             | 83,97      | 238     |
| 13.02 | <i>n</i> -C17 Alkane                                             | 85,71      | 240     |
| 13.76 | Coniferyl aldehyde                                               | 178,135    | 178     |
| 13.85 | Tetradecanoic acid                                               | 73,60      | 228     |
| 14.55 | Unknown                                                          | 200,157    | -       |
| 14.78 | Unknown                                                          | 178,55     | -       |
| 14.84 | Pentadecanoic acid                                               | 73,60,242* | 242     |
| 15.21 | Heptadecanone                                                    | 58,43,254* | 254     |
| 15.43 | Hexadecenoic acid, methyl ester                                  | 74,87,270* | 270     |
| 16.08 | Hexadecenoic acid                                                | 73,60,256* | 256     |
| 16.83 | Heptadecanoic acid                                               | 73,60,270* | 270     |
| 16.93 | Epimanol                                                         | 81,95      | 290     |
| 17.19 | Nonadecanone                                                     | 58,43,282* | 282     |
| 17.43 | Methyl stearate                                                  | 74,87      | 298     |
| 17.91 | Octadecanoic acid                                                | 73,129,284 | 284     |
| 18.22 | Retene                                                           | 219,234    | 234     |
| 18.31 | Unknown                                                          | 246,256    | -       |
| 18.64 | 1,4-Dimethyl-6-phenyl-naphthalene, eicosanoic acid, methyl ester | 87,74      | 232,326 |
| 18.67 | Unknown                                                          | 272,273    | -       |
| 18.75 | Unknown                                                          | 286,130    | -       |
| 18.83 | Unknown                                                          | 137        | -       |
| 18.84 | Methyl dehydroabietate                                           | 239,240    | 314     |
| 18.90 | Unknown                                                          | 137        | -       |
| 18.95 | Unknown                                                          | 97,83      | -       |
| 19.00 | Unknown                                                          | 59,72      | -       |
| 19.09 | Unknown                                                          | 151,161    | -       |
| 19.16 | Unknown                                                          | 137,286    | -       |
| 19.21 | Unknown                                                          | 98,43      | -       |
| 19.28 | Unknown                                                          | 91,117     | -       |
| 19.36 | <i>n</i> -C25 Alkene                                             | 83,97      | 336     |
| 19.40 | Unknown                                                          | 137,286    | -       |
| 19.78 | Unknown                                                          | 131,103    | -       |

|       |         |         |   |
|-------|---------|---------|---|
| 19.83 | Unknown | 253,131 | - |
|-------|---------|---------|---|

**Table S9.** Compounds identified in spruce without bark pyrogram obtained at 550 °C. \*Ions with low intensity important for compound identification.

## Pyrograms

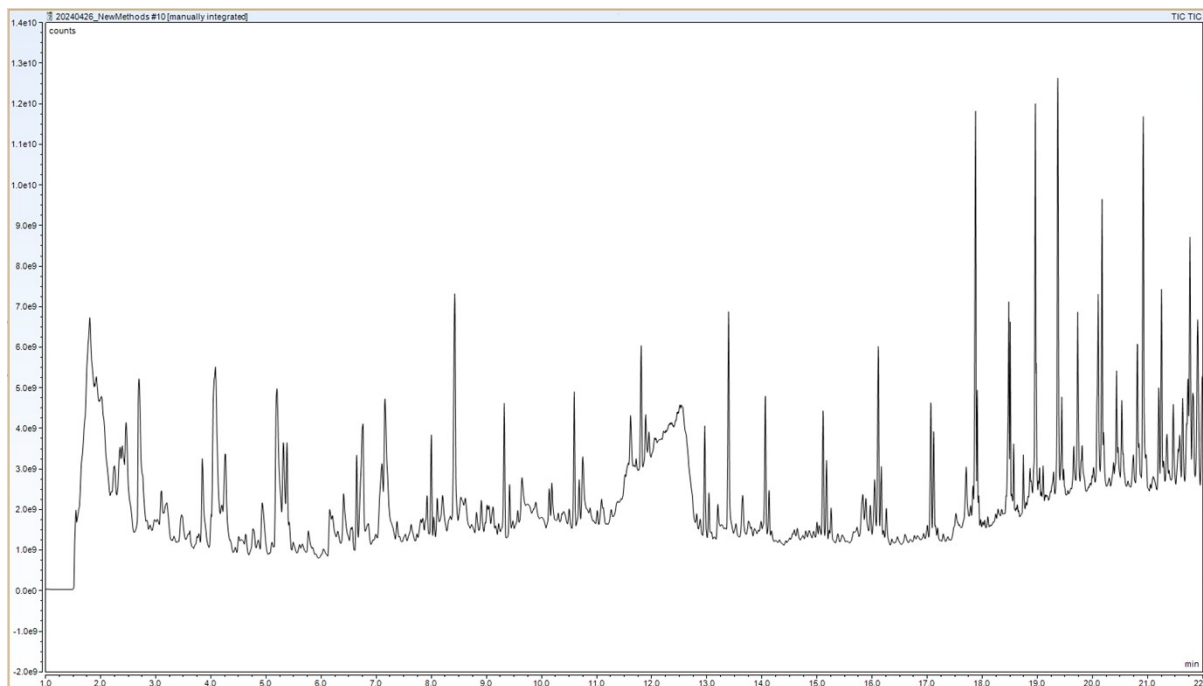

**Figure S11.** Islay peat pyrogram.

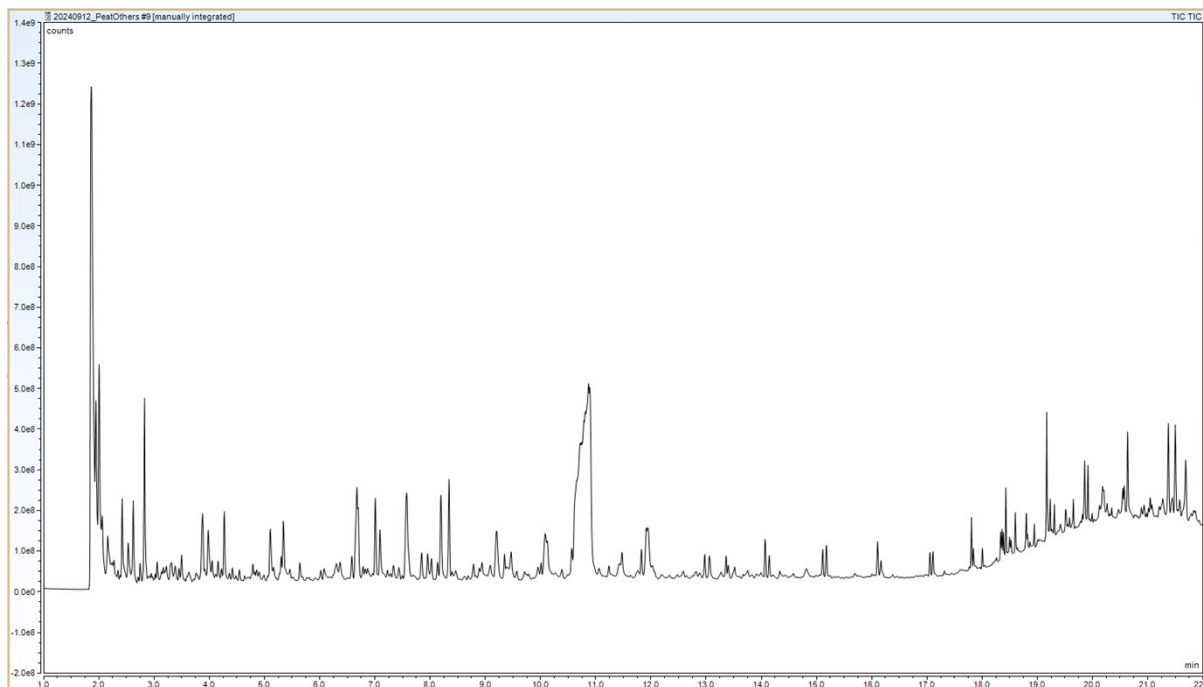

**Figure S12.** Aberdeenshire peat pyrogram.

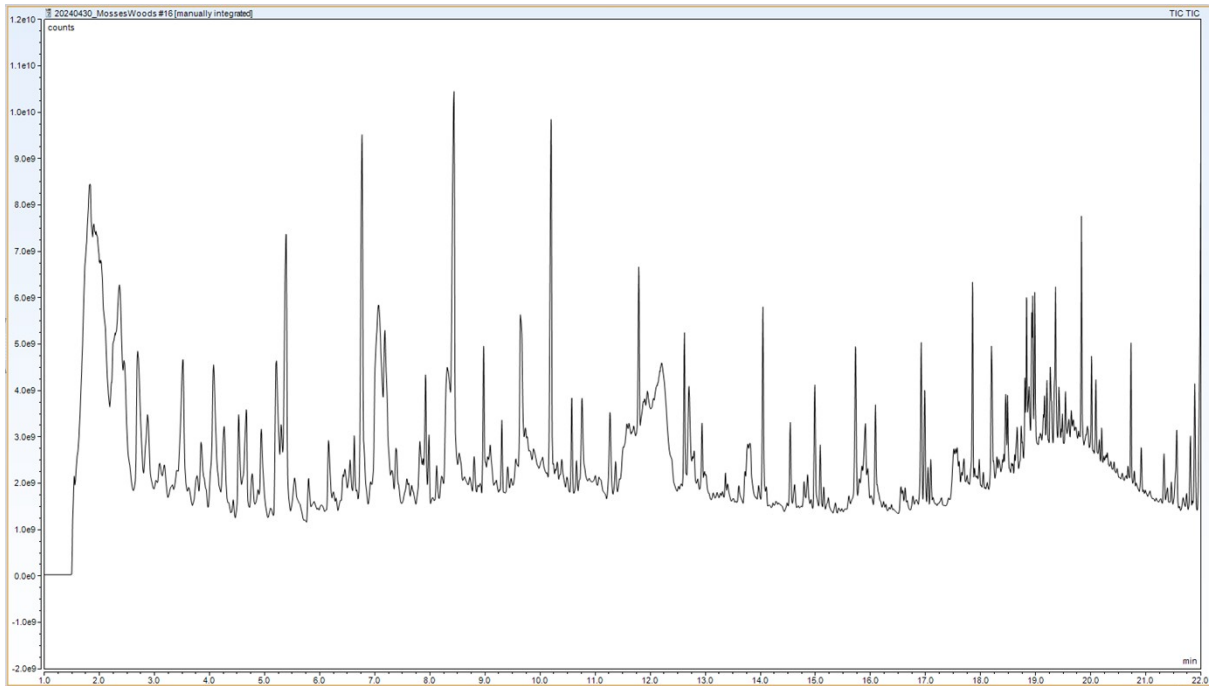

Figure S13. Spruce with bark pyrogram.

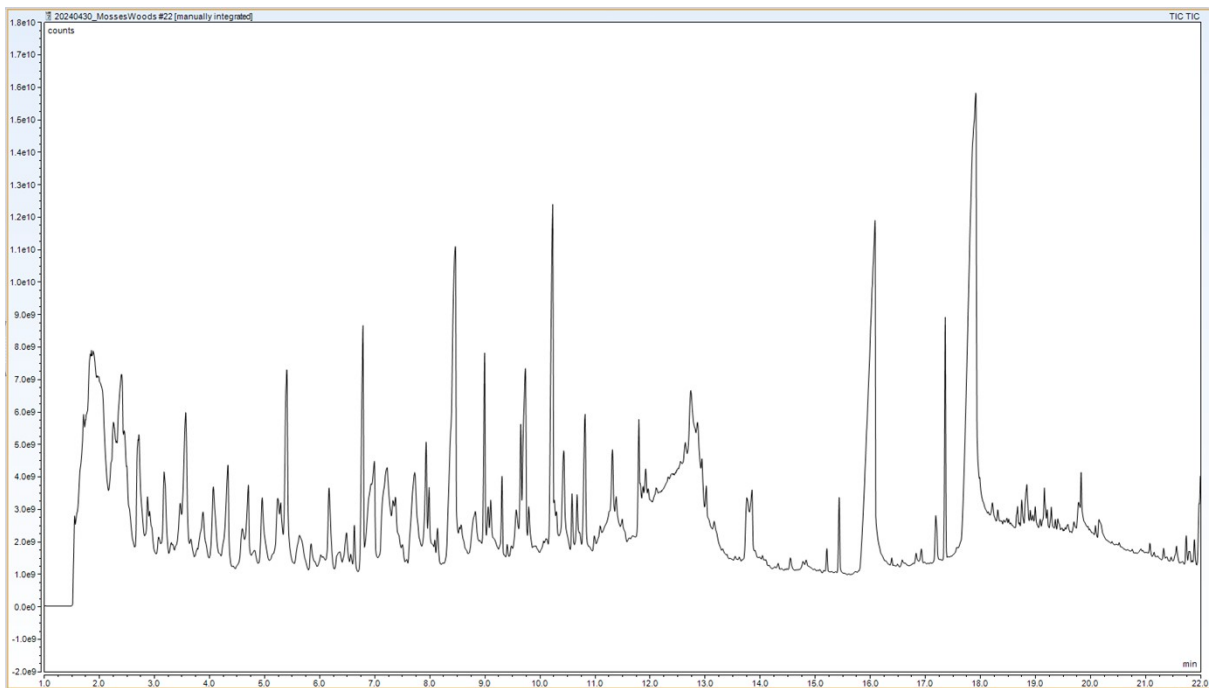

Figure S14. Spruce without bark pyrogram.

### Sensory Analysis

| Sensory Characteristics | p-value | PNMS1  | PNMS2   | SNMS1  | SNMS2   |
|-------------------------|---------|--------|---------|--------|---------|
| Overall peat intensity  | ≤0.001  | 1.61 a | 1.39 ab | 0.80 c | 1.11 bc |
| Burnt                   | ≤0.001  | 1.19 a | 1.14 ab | 0.46 c | 0.68 bc |
| Smoky                   | 0.01    | 1.23 a | 1.18 a  | 0.67 b | 0.89 ab |
| Medicinal               | 0.67    | 0.46   | 0.49    | 0.40   | 0.34    |
| Sulphury                | 0.77    | 0.19   | 0.25    | 0.21   | 0.13    |

|                      |      |        |         |         |        |
|----------------------|------|--------|---------|---------|--------|
| <b>Meaty</b>         | 0.02 | 0.06 b | 0.19 ab | 0.15 ab | 0.30 a |
| <b>Feinty</b>        | 0.57 | 0.49   | 0.58    | 0.54    | 0.43   |
| <b>Cereal</b>        | 0.12 | 0.49   | 0.56    | 0.81    | 0.55   |
| <b>Green/ grassy</b> | 0.74 | 0.22   | 0.26    | 0.30    | 0.32   |
| <b>Floral</b>        | 0.94 | 0.14   | 0.14    | 0.14    | 0.18   |
| <b>Fruity/estery</b> | 1.00 | 0.35   | 0.34    | 0.36    | 0.34   |
| <b>Solventy</b>      | 0.29 | 0.30   | 0.31    | 0.15    | 0.24   |
| <b>Soapy</b>         | 0.18 | 0.09   | 0.12    | 0.38    | 0.41   |
| <b>Sweet</b>         | 0.38 | 0.18   | 0.14    | 0.24    | 0.19   |
| <b>Nutty</b>         | 0.49 | 0.10   | 0.09    | 0.21    | 0.14   |
| <b>Oily</b>          | 0.53 | 0.39   | 0.55    | 0.40    | 0.53   |
| <b>Sour</b>          | 0.56 | 0.08   | 0.22    | 0.20    | 0.26   |
| <b>Stale</b>         | 0.27 | 0.19   | 0.19    | 0.08    | 0.15   |

**Table S10.** Mean panel scores and results of ANOVA and Tukey's post-hoc tests (a,b,c represent sample groupings in Tukey's post-hoc test;  $p < 0.05$ )

## NMR

| Sample | Description                                                              |
|--------|--------------------------------------------------------------------------|
| PLW    | Low wines produced using peated malt                                     |
| PNMS1  | First distillation fraction produced using peated malt                   |
| PNMS2  | Second distillation fraction produced using peated malt                  |
| PNMS3  | Third distillation fraction produced using peated malt                   |
| SLW    | Low wines produced using malt smoked with spruce wood                    |
| SNMS1  | First distillation fraction produced using malt smoked with spruce wood  |
| SNMS2  | Second distillation fraction produced using malt smoked with spruce wood |
| SNMS3  | Third distillation fraction produced using malt smoked with spruce wood  |

**Table S10.** Details of samples analysed using NMR.

## Spectra

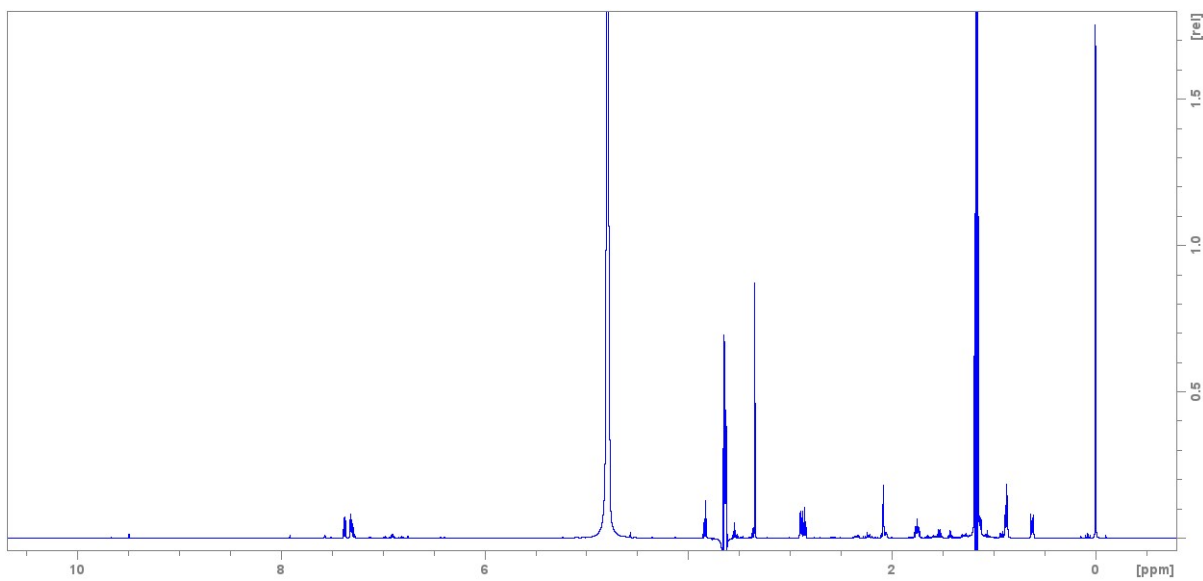

**Figure S15.**  $^1\text{H}$  NMR spectrum of peated low wines recorded at 600 MHz.

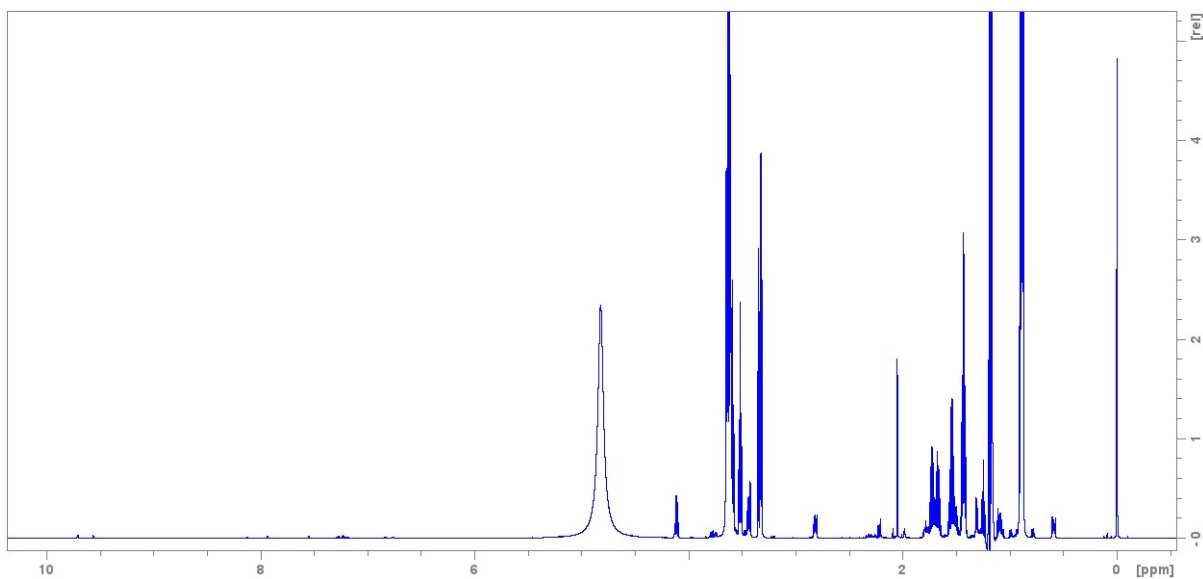

**Figure S16.**  $^1\text{H}$  NMR spectrum of peated new make spirit fraction 1.

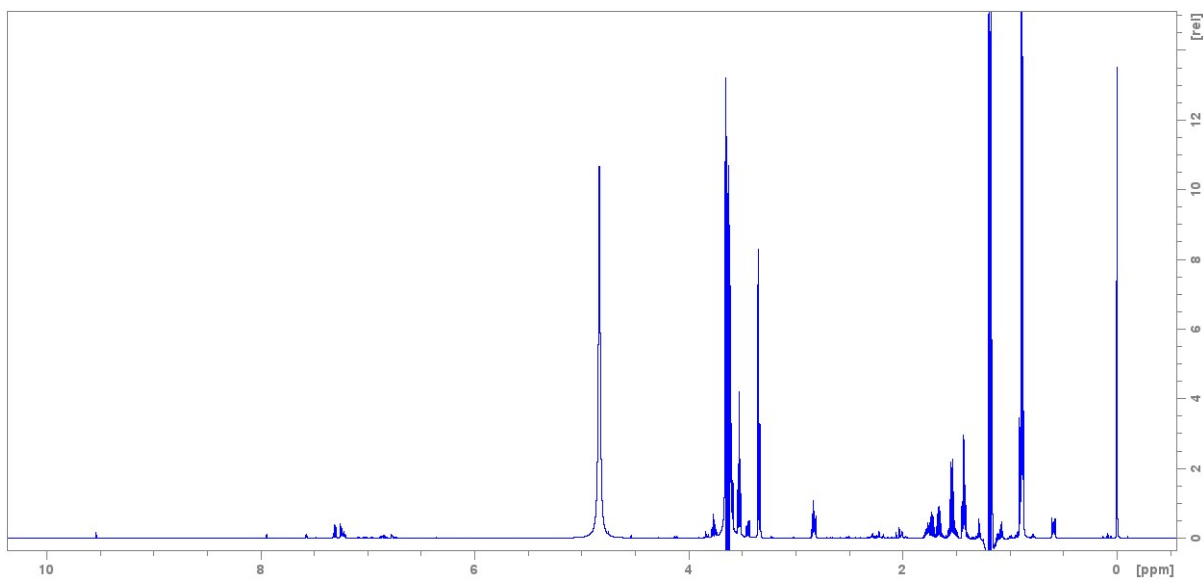

**Figure S17.** <sup>1</sup>H NMR spectrum of peated new make spirit fraction 2.

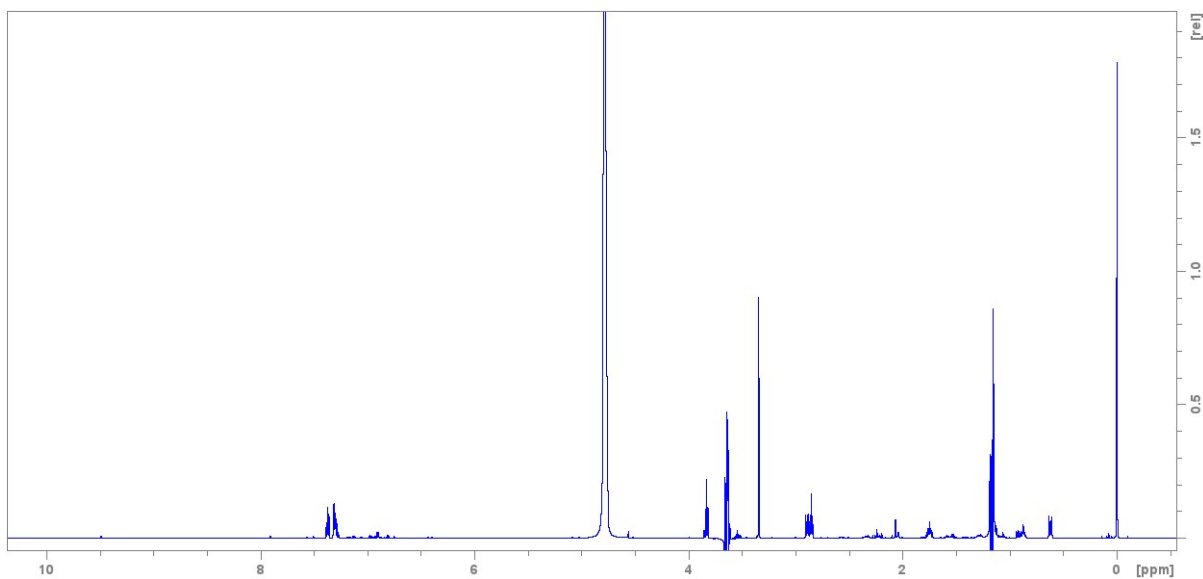

**Figure S18.** <sup>1</sup>H NMR spectrum of peated new make spirit fraction 3.

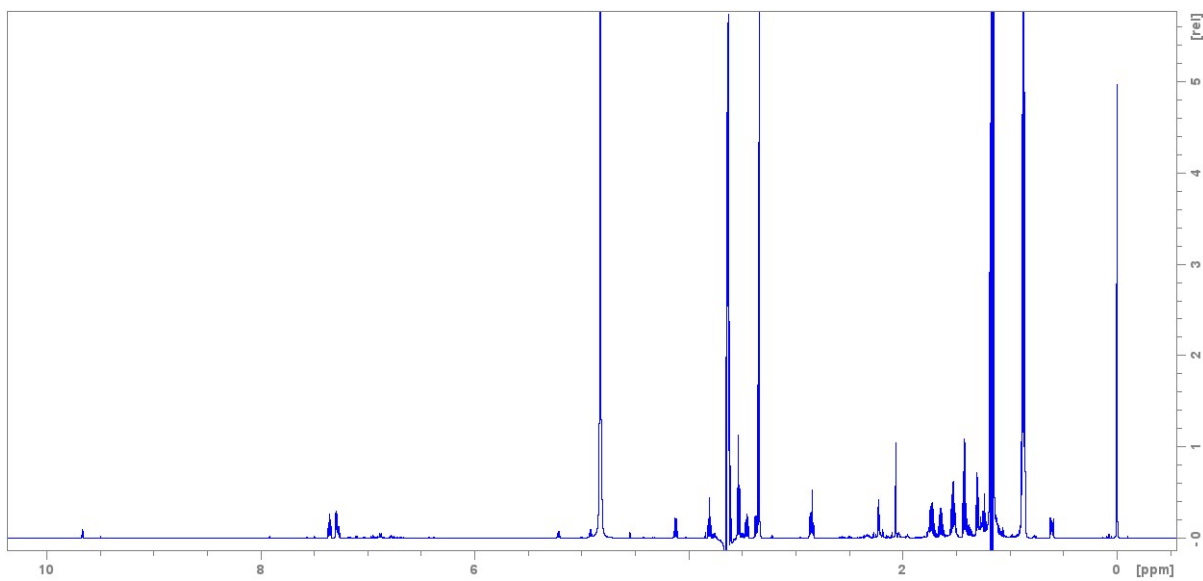

**Figure S19.** <sup>1</sup>H NMR spectrum of spruce smoked low wines.

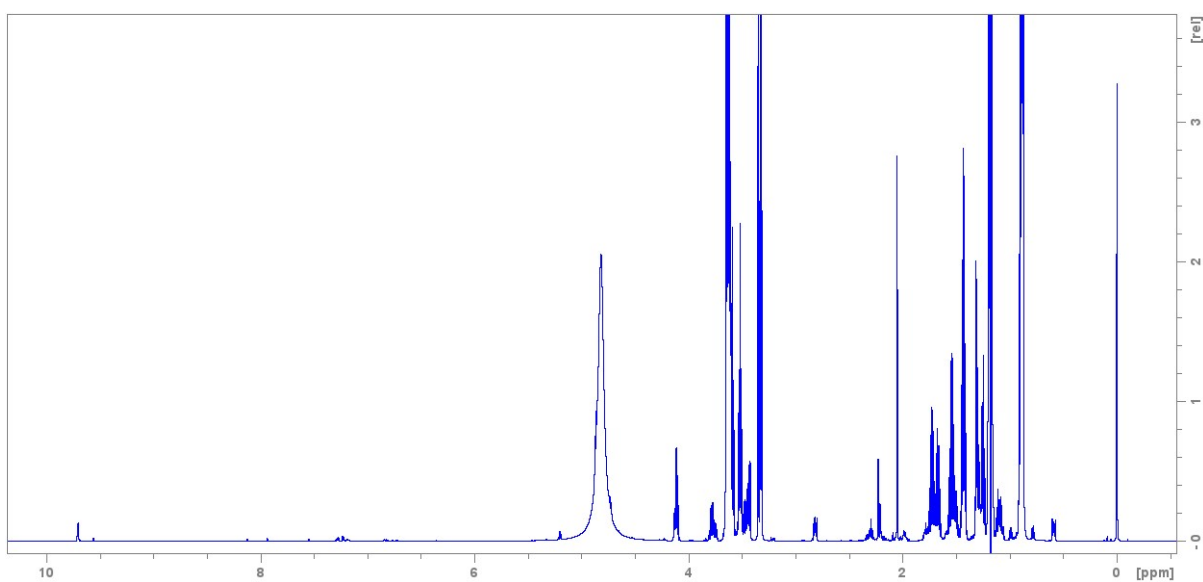

**Figure S20.** <sup>1</sup>H NMR spectrum of spruce smoked new make spirit fraction 1.

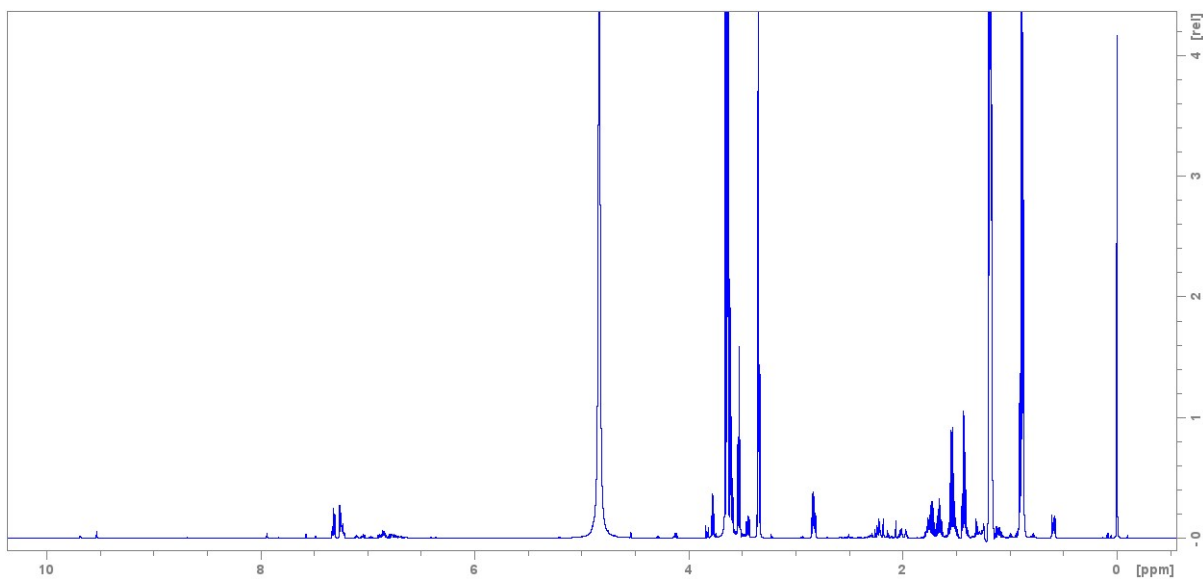

**Figure S21.**  $^1\text{H}$  NMR spectrum of spruce smoked new make spirit fraction 2.

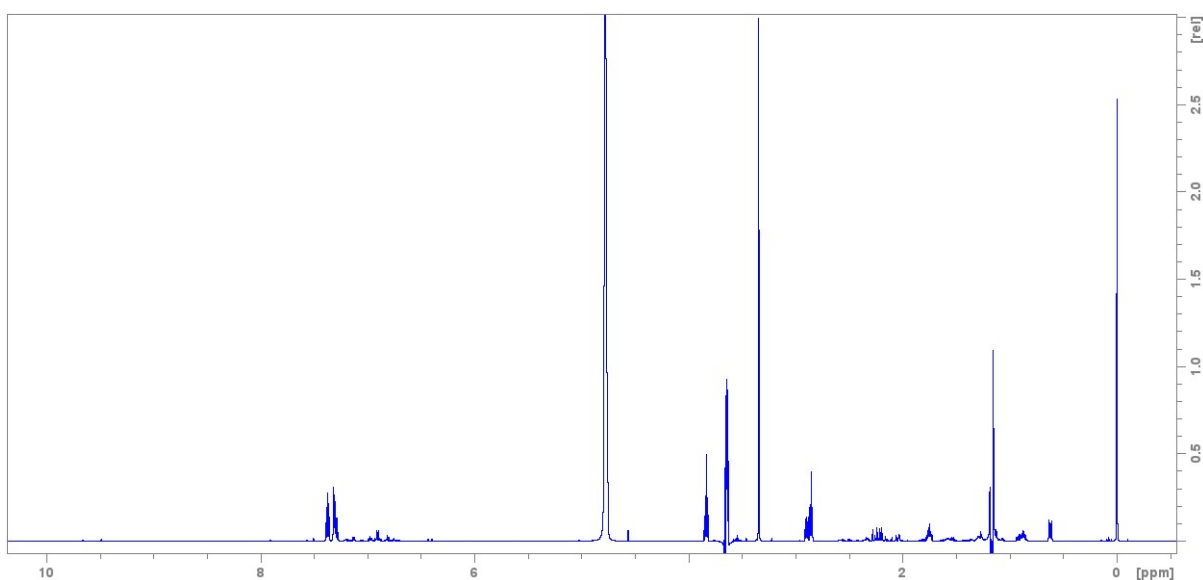

**Figure S22.**  $^1\text{H}$  NMR spectrum of spruce smoked new make spirit fraction 3.

### Signal assignments

| $\delta_{\text{H}}$ / ppm | Multiplicity        | Integration | Inferences                                                 | Concentration/<br>mmol L <sup>-1</sup> |
|---------------------------|---------------------|-------------|------------------------------------------------------------|----------------------------------------|
| 0                         | Singlet             | 10          | DSS 3xCH <sub>3</sub>                                      | 1.00                                   |
| 0.62                      | Multiplet           | 2.23        | DSS CH <sub>2</sub>                                        | 1.00                                   |
| 0.77                      | Multiplet           | -           | Fusel alcohols CH <sub>3</sub> groups<br>carbon satellites | -                                      |
| 0.87                      | Multiplet           | -           | Fusel alcohols CH <sub>3</sub> groups                      | -                                      |
| 0.98                      | Multiplet           | -           | Fusel alcohols CH <sub>3</sub> groups<br>carbon satellites | -                                      |
| 1.082                     | Triplet, J = 7.5 Hz | -           | Fusel alcohol ethyl ester CH <sub>3</sub>                  | -                                      |
| 1.17                      | Distorted           | -           | Ethanol CH <sub>3</sub> group, suppressed                  | -                                      |
| 1.24                      | Triplet, J = 7.2 Hz | 0.32        | Ethyl acetate CH <sub>3</sub> next to CH <sub>2</sub>      | 0.096                                  |

|       |                         |       |                                                                        |        |
|-------|-------------------------|-------|------------------------------------------------------------------------|--------|
| 1.27  | Triplet, J = 7.0 Hz     | 0.40  | Fusel alcohol ethyl ester CH <sub>3</sub>                              | -      |
| 1.32  | Doublet, J = 5.3 Hz     | 0.17  | Lactic acid CH <sub>3</sub> next to CH                                 | 0.050  |
| 1.43  | Quartet, J = 6.9 Hz     | 0.41  | 3-methyl-1-butanol CH <sub>2</sub> next to CH and CH <sub>2</sub>      | 0.18   |
| 1.53  | Sextet, J = 7.1 Hz      | 0.80  | n-propanol CH <sub>2</sub> next to CH <sub>2</sub> and CH <sub>3</sub> | 0.36   |
| 1.65  | Nonet, J = 6.7 Hz       | 0.22  | 3-methyl-1-butanol CH next to 2xCH <sub>3</sub> and CH <sub>2</sub>    | 0.20   |
| 1.75  | Multiplet               | 2.39  | DSS CH <sub>2</sub>                                                    | 1.07   |
| 2.00  | Multiplet               | -     | Acetate esters                                                         | -      |
| 2.05  | Multiplet               | 0.52  | DSS                                                                    | 0.23   |
| 2.08  | Singlet                 | 2.14  | Acetic acid CH <sub>3</sub>                                            | 0.64   |
| 2.10  | Singlet                 | 0.12  | Ethyl acetate isolated CH <sub>3</sub>                                 | 0.035  |
| 2.20  | Singlet                 | 0.062 | <i>o</i> -cresol CH <sub>3</sub>                                       | 0.018  |
| 2.22  | Singlet                 | 0.068 | Acetone 2xCH <sub>3</sub>                                              | 0.010  |
| 2.23  | Doublet, J = 2.9 Hz     | 0.13  | Acetaldehyde CH <sub>3</sub>                                           | 0.039  |
| 2.26  | Singlet                 | 0.039 | <i>p</i> -cresol CH <sub>3</sub>                                       | 0.012  |
| 2.33  | Triplet, J = 7.3 Hz     | 0.27  | Ethyl ester                                                            | -      |
| 2.86  | Triplet, J = 6.7 Hz     | 1.56  | 2-phenylethanol CH <sub>2</sub> next to CH <sub>2</sub>                | 0.70   |
| 2.95  | Triplet, J = 6.7 Hz     | 0.012 | 2-phenylethyl acetate CH <sub>2</sub> next to CH <sub>2</sub>          | 0.0053 |
| 3.22  | Singlet                 | 0.021 | Methanol CH <sub>3</sub> carbon satellite                              | -      |
| 3.34  | Singlet                 | 4.31  | Methanol CH <sub>3</sub> isolated                                      | 1.29   |
| 3.36  | Doublet, J = 6.6 Hz     | 0.41  | Isobutanol CH <sub>2</sub> next to CH and OH                           | 0.18   |
| 3.38  | Singlet                 | 0.022 | Part of 2-methylbutanol diastereotopic CH <sub>2</sub>                 | -      |
| 3.39  | Doublet, J = 6.6 Hz     | 0.055 | Part of 2-methylbutanol diastereotopic CH <sub>2</sub>                 | -      |
| 3.472 | DD, J = 10.8 Hz, 5.9 Hz | 0.088 | Part of 2-methylbutanol diastereotopic CH <sub>2</sub>                 | 0.079  |
| 3.55  | Triplet, J = 6.6 Hz     | 0.52  | n-propanol CH <sub>2</sub> next to CH <sub>2</sub> and OH              | 0.24   |
| 3.64  | Distorted               | -     | Ethanol CH <sub>2</sub> suppressed                                     | -      |
| 3.83  | Triplet, J = 6.8 Hz     | 1.43  | Phenylethanol CH <sub>2</sub>                                          | 0.64   |
| 3.86  | Singlet                 | 0.074 | Guaiacol OCH <sub>3</sub>                                              | 0.022  |
| 4.12  | Quartet, J = 7.1 Hz     | 0.046 | Lactic acid CH                                                         | 0.041  |
| 4.56  | Singlet                 | 0.15  | Furfuryl alcohol CH <sub>2</sub>                                       | 0.067  |
| 4.79  | Broad singlet           | -     | Water OH suppressed                                                    | -      |
| 5.23  | Quartet, J = 5.3 Hz     | -     | Acetaldehyde water hemiacetal                                          | -      |
| 6.39  | Doublet, J = 3.2 Hz     | 0.036 | 2-methylfuran CH                                                       | 0.032  |
| 6.43  | DD, J = 3.1 Hz, 1.9 Hz  | 0.034 | 2-methylfuran CH                                                       | 0.031  |
| 6.75  | DD, J = 3.6 Hz, 1.6 Hz  | 0.12  | Furfural CH next to 2xCH                                               | 0.11   |

|      |                     |       |                                   |       |
|------|---------------------|-------|-----------------------------------|-------|
| 6.80 | Doublet, J = 8.5 Hz | 0.072 | o-cresol aromatic CH next to CH   | 0.065 |
| 6.90 | Doublet, J = 7.9 Hz | 0.29  | Phenol 2xCH next to CH            | 0.13  |
| 6.97 | Triplet, J = 7.3 Hz | 0.14  | o-cresol aromatic CH next to 2xCH | 0.13  |
| 7.06 | Doublet, J = 7.7 Hz | 0.022 | p-cresol 2xCH next to CH          | 0.078 |
| 7.28 | Triplet, J = 7.3 Hz | 0.47  | Phenol 2xCH next to 2xCH          | 0.21  |
| 7.31 | Doublet, J = 7.9 Hz | 1.88  | 2-phenylethanol 2x aromatic CH    | 0.85  |
| 7.37 | Triplet, J = 7.6 Hz | 1.40  | 2-phenylethanol 2x aromatic CH    | 0.63  |
| 7.57 | Doublet, J = 3.6 Hz | 0.11  | Furfural CH next to CH            | 0.099 |
| 7.91 | Singlet             | 0.11  | Furfural CH                       | 0.097 |
| 9.49 | Singlet             | 0.11  | Furfural CHO                      | 0.097 |
| 9.66 | Quartet, J = 3.0 Hz | 0.023 | Acetaldehyde CHO                  | 0.021 |

**Table S11.** Signal assignment for NMR spectrum of low wines produced using peated malt, recorded at University of Edinburgh using a 600 MHz spectrometer, PLW.

| $\delta_H$ / ppm | Multiplicity        | Integration | Inferences                                                                | Concentration/<br>mmol L <sup>-1</sup> |
|------------------|---------------------|-------------|---------------------------------------------------------------------------|----------------------------------------|
| 0                | Singlet             | 10          | DSS 3xCH <sub>3</sub>                                                     | 1.00                                   |
| 0.59             | Multiplet           | 2.21        | DSS CH <sub>2</sub>                                                       | 0.99                                   |
| 0.78             | Multiplet           | 1.24        | Fusel alcohols CH <sub>3</sub> groups<br>carbon satellites                | -                                      |
| 0.89             | Multiplet           | 200.05      | Fusel alcohols CH <sub>3</sub> groups                                     | -                                      |
| 1.00             | Multiplet           | 1.37        | Fusel alcohols CH <sub>3</sub> groups<br>carbon satellites                | -                                      |
| 1.09             | Triplet, J = 7.5 Hz | -           | Ethanol CH <sub>3</sub> carbon satellite                                  | -                                      |
| 1.11             | Triplet, J = 7.4 Hz | 4.74        | Fusel alcohol ethyl ester CH <sub>3</sub>                                 | -                                      |
| 1.18             | Distorted           | -           | Ethanol CH <sub>3</sub> suppressed                                        | -                                      |
| 1.25             | Triplet, J = 7.1 Hz | 7.43        | Ethyl acetate CH <sub>3</sub> next to CH <sub>2</sub>                     | 2.23                                   |
| 1.29             | Singlet             | 1.24        | Fusel alcohol ethyl ester CH <sub>3</sub>                                 | -                                      |
| 1.31             | Doublet, J = 4.8 Hz | 2.97        | Lactic acid CH <sub>3</sub> next to CH                                    | 0.89                                   |
| 1.43             | Quartet, J = 7.0 Hz | 29.09       | 3-methyl-1-butanol CH <sub>2</sub> next to<br>CH and CH <sub>2</sub>      | 13.09                                  |
| 1.49             | Multiplet           | -           | n-butanol CH <sub>2</sub> groups                                          | -                                      |
| 1.54             | Sextet, J = 7.2 Hz  | 19.6        | n-propanol CH <sub>2</sub> next to CH <sub>2</sub> and<br>CH <sub>3</sub> | 8.82                                   |
| 1.68             | Nonet, J = 6.7 Hz   | 12.4        | 3-methyl-1-butanol CH next to<br>2xCH <sub>3</sub> and CH <sub>2</sub>    | 11.2                                   |
| 1.73             | Nonet, J = 6.6 Hz   | 11.5        | Isobutanol CH next to 2xCH <sub>3</sub><br>and CH <sub>2</sub>            | 5.18                                   |
| 1.78             | Multiplet           | 1.77        | DSS CH <sub>2</sub>                                                       | 0.80                                   |
| 1.94             | Singlet             | 0.028       | Acetic acid CH <sub>3</sub> carbon satellite                              | -                                      |
| 1.99             | Multiplet           | -           | Acetate esters                                                            | -                                      |
| 2.05             | Singlet             | 4.86        | Acetic acid CH <sub>3</sub>                                               | 1.46                                   |
| 2.08             | Singlet             | 0.054       | Ethyl acetate CH <sub>3</sub> isolated                                    | 0.016                                  |
| 2.16             | Singlet             | 0.032       | Acetic acid CH <sub>3</sub> carbon satellite                              | -                                      |
| 2.18             | Singlet             | 0.073       | o-cresol CH <sub>3</sub>                                                  | 0.022                                  |

|      |                         |        |                                                            |        |
|------|-------------------------|--------|------------------------------------------------------------|--------|
| 2.21 | Singlet                 | 0.49   | Acetone 2xCH <sub>3</sub>                                  | 0.074  |
| 2.23 | Doublet, J = 2.9 Hz     | 0.65   | Acetaldehyde CH <sub>3</sub> next to CH                    | 0.19   |
| 2.30 | Triplet, J = 7.4 Hz     | 0.63   | Ethyl ester                                                | -      |
| 2.82 | Multiplet               | 2.24   | DSS CH <sub>2</sub>                                        | 1.01   |
| 2.93 | Doublet, J = 7.7 Hz     | 0.032  | 2-phenylethyl acetate CH <sub>2</sub>                      | 0.014  |
| 3.21 | Doublet, J = 6.7 Hz     | 0.16   | Isobutanol CH <sub>2</sub> carbon satellite                | -      |
| 3.23 | Singlet                 | 0.028  | Methanol CH <sub>3</sub> carbon satellite                  | -      |
| 3.32 | Doublet, J = 6.6 Hz     | 24.56  | Isobutanol CH <sub>2</sub> next to CH and OH               | 11.05  |
| 3.35 | Singlet                 | 2.86   | Methanol CH <sub>3</sub>                                   | 0.86   |
| 3.44 | DD, J = 10.6 Hz, 6.0 Hz | 6.14   | Part of 2-methylbutanol diastereotopic CH <sub>2</sub>     | 2.76   |
| 3.48 | Quartet, J = 7.1 Hz     | -      | Ethanol CH <sub>2</sub> carbon satellite                   | -      |
| 3.52 | Triplet, J = 6.8 Hz     | 15.03  | n-propanol CH <sub>2</sub>                                 | 6.76   |
| 3.59 | Triplet, J = 7.1 Hz     | 23.23  | 3-methyl-1-butanol CH <sub>2</sub> next to CH <sub>2</sub> | 10.45  |
| 3.63 | Distorted               | -      | Ethanol CH <sub>2</sub> suppressed                         | -      |
| 3.75 | Quartet, J = 6.8 Hz     | -      | Ethanol CH <sub>2</sub> carbon satellite                   | -      |
| 3.78 | Quartet, J = 7.2 Hz     | -      | Phenylethanol CH <sub>2</sub>                              | -      |
| 4.12 | Quartet, J = 7.2 Hz     | -      | Lactic acid CH                                             | -      |
| 4.13 | Quartet, J = 6.8 Hz     | -      | Ethyl acetate CH <sub>2</sub> next to CH <sub>3</sub>      | -      |
| 4.27 | Triplet, J = 6.8 Hz     | 0.19   | 2-phenylethyl acetate CH <sub>2</sub>                      | 0.087  |
| 4.53 | Singlet                 | -      | Furfuryl alcohol CH <sub>2</sub>                           | -      |
| 4.82 | Broad singlet           | -      | Water OH suppressed                                        | -      |
| 4.87 | Quartet, J = 5.2 Hz     | -      | Acetaldehyde ethyl hemiacetal                              | -      |
| 5.20 | Quartet, J = 5.2 Hz     | -      | Acetaldehyde water hemiacetal                              | -      |
| 6.33 | Doublet, J = 3.2 Hz     | 0.013  | 2-methylfuran CH                                           | 0.011  |
| 6.35 | Doublet, J = 4.0 Hz     | 0.0086 | 2-methylfuran CH                                           | 0.0077 |
| 6.73 | Multiplet               | 0.018  | o-cresol                                                   | 0.016  |
| 6.76 | DD, J = 3.6 Hz, 1.6 Hz  | 0.12   | Furfural CH next to 2xCH                                   | 0.11   |
| 6.83 | Doublet, J = 8.5 Hz     | 0.070  | Phenol 2xCH next to CH                                     | 0.032  |
| 6.92 | Multiplet               | 0.0090 | p-cresol 2xCH next to CH                                   | 0.0041 |
| 6.97 | Doublet, J = 8.2 Hz     | 0.015  | o-cresol CH next to CH                                     | 0.013  |
| 7.04 | Doublet, J = 8.5 Hz     | 0.011  | o-cresol CH next to CH                                     | 0.010  |
| 7.19 | Doublet, J = 7.3 Hz     | 0.12   | Phenol 2xCH next to CH                                     | 0.054  |
| 7.23 | Doublet, J = 7.3 Hz     | 0.22   | 2-phenylethanol 2x aromatic CH                             | 0.098  |
| 7.28 | Triplet, J = 7.5 Hz     | 0.21   | 2-phenylethanol 2x aromatic CH                             | 0.093  |
| 7.55 | Doublet, J = 3.8 Hz     | 0.13   | Furfural CH                                                | 0.11   |
| 7.94 | Singlet                 | 0.12   | Furfural CH                                                | 0.11   |
| 8.12 | Singlet                 | 0.036  | Ethyl formate CH                                           | 0.032  |
| 9.56 | Singlet                 | 0.12   | Furfural CHO                                               | 0.11   |
| 9.59 | Doublet, J = 1.9 Hz     | 0.009  | 5-HMF CHO                                                  | 0.0081 |
| 9.71 | Quartet, J = 2.9 Hz     | 0.19   | Acetaldehyde CHO                                           | 0.17   |
| 9.99 | Singlet                 | 0.0024 | Vanillin CHO                                               | 0.0021 |

**Table S12.** Signal assignment for NMR spectrum of new make spirit distillate fraction 1 produced using peated malt, recorded at University of Edinburgh using a 600 MHz spectrometer, PNMS1.

| $\delta_H$ / ppm | Multiplicity               | Integration | Inferences                                                                | Concentration/<br>mmol L <sup>-1</sup> |
|------------------|----------------------------|-------------|---------------------------------------------------------------------------|----------------------------------------|
| 0                | Singlet                    | 10          | DSS 3xCH <sub>3</sub>                                                     | 1.00                                   |
| 0.59             | Multiplet                  | 2.19        | DSS CH <sub>2</sub>                                                       | 0.98                                   |
| 0.79             | Multiplet                  | 0.47        | Fusel alcohols CH <sub>3</sub> groups<br>carbon satellites                | -                                      |
| 0.89             | Multiplet                  | 71.33       | Fusel alcohols CH <sub>3</sub> groups                                     | -                                      |
| 0.99             | Multiplet                  | 0.10        | Fusel alcohols CH <sub>3</sub> groups<br>carbon satellites                | -                                      |
| 1.12             | Triplet, J = 7.5 Hz        | -           | Fusel alcohol ethyl ester CH <sub>3</sub>                                 | -                                      |
| 1.19             | Distorted                  | -           | Ethanol CH <sub>3</sub> suppressed                                        | -                                      |
| 1.25             | Triplet, J = 7.2 Hz        | -           | Ethyl acetate CH <sub>3</sub> next to CH <sub>2</sub>                     | -                                      |
| 1.29             | Triplet, J = 7.0 Hz        | 0.99        | Fusel alcohol ethyl ester CH <sub>3</sub>                                 | -                                      |
| 1.31             | Doublet, J = 5.3 Hz        | 0.082       | Lactic acid CH <sub>3</sub>                                               | 0.025                                  |
| 1.43             | Quartet, J = 7.0 Hz        | 10.2        | 3-methyl-1-butanol CH <sub>2</sub> next to<br>CH and CH <sub>2</sub>      | 4.59                                   |
| 1.54             | Sextet, J = 7.2 Hz         | 10.6        | n-propanol CH <sub>2</sub> next to CH <sub>2</sub> and<br>CH <sub>3</sub> | 4.79                                   |
| 1.66             | Nonet, J = 6.7 Hz          | 4.00        | 3-methyl-1-butanol CH next to<br>2xCH <sub>3</sub> and CH <sub>2</sub>    | 3.60                                   |
| 1.73             | Nonet, J = 6.7 Hz          | 4.55        | Isobutanol CH next to 2xCH <sub>3</sub><br>and CH <sub>2</sub>            | 4.09                                   |
| 1.77             | Multiplet                  | -           | DSS CH <sub>2</sub>                                                       | -                                      |
| 2.01             | Quintet, J = 2.1 Hz        | 0.56        | DSS                                                                       | 0.25                                   |
| 2.03             | Singlet                    | 0.076       | Acetate ester                                                             | -                                      |
| 2.03             | Singlet                    | 0.43        | Acetic acid CH <sub>3</sub>                                               | 0.13                                   |
| 2.06             | Singlet                    | 0.14        | Ethyl acetate CH <sub>3</sub> isolated                                    | 0.043                                  |
| 2.18             | Multiplet                  | -           | o-cresol CH <sub>3</sub>                                                  | -                                      |
| 2.20             | Singlet                    | 0.072       | Acetone 2xCH <sub>3</sub>                                                 | 0.011                                  |
| 2.22             | Multiplet                  | -           | Acetaldehyde CH <sub>3</sub>                                              | -                                      |
| 2.26             | Singlet                    | 0.084       | p-cresol CH <sub>3</sub>                                                  | 0.025                                  |
| 2.28             | Triplet, J = 7.3 Hz        | 0.28        | Ethyl ester                                                               | -                                      |
| 2.83             | Multiplet                  | 3.58        | 2-phenylethanol CH <sub>2</sub> triplet, DSS<br>CH <sub>2</sub> overlap   | -                                      |
| 2.93             | Triplet                    | -           | 2-phenylethyl acetate CH <sub>2</sub>                                     | -                                      |
| 3.22             | Doublet, J = 6.5 Hz        | 0.057       | Isobutanol carbon satellite                                               | -                                      |
| 3.23             | Singlet                    | 0.021       | Methanol CH <sub>3</sub> carbon satellite                                 | -                                      |
| 3.34             | Doublet, J = 7.1 Hz        | 7.14        | Isobutanol CH <sub>2</sub> next to CH and<br>OH                           | 3.21                                   |
| 3.35             | Singlet                    | 2.87        | Methanol CH <sub>3</sub>                                                  | 0.86                                   |
| 3.45             | DD, J = 10.7 Hz, 5.9<br>Hz | 2.06        | Part of 2-methylbutanol<br>diastereotopic CH <sub>2</sub>                 | 1.86                                   |
| 3.53             | Triplet, J = 6.8 Hz        | 9.75        | n-propanol CH <sub>2</sub>                                                | 4.39                                   |
| 3.60             | Triplet, J = 7.2 Hz        | -           | 3-methyl-1-butanol CH <sub>2</sub> next to<br>CH <sub>2</sub>             | -                                      |
| 3.64             | Distorted                  | -           | Ethanol CH <sub>2</sub> suppressed                                        | -                                      |

|      |                        |       |                                        |       |
|------|------------------------|-------|----------------------------------------|-------|
| 3.77 | Quartet, J = 7.0 Hz    | 2.46  | Phenylethanol CH <sub>2</sub>          | 1.10  |
| 3.82 | Singlet                | 0.12  | Eugenol OCH <sub>3</sub>               | 0.035 |
| 3.84 | Singlet                | 0.21  | Guaiacol OCH <sub>3</sub>              | 0.064 |
| 4.12 | Quartet, J = 7.2 Hz    | 0.17  | Lactic acid CH next to CH <sub>3</sub> | 0.15  |
| 4.28 | Triplet, J = 6.7 Hz    | 0.060 | 2-phenylethyl acetate CH <sub>2</sub>  | 0.027 |
| 4.54 | Singlet                | 0.12  | Furfuryl alcohol CH <sub>2</sub>       | 0.052 |
| 4.84 | Broad singlet          | -     | Water OH suppressed                    | -     |
| 5.21 | Quartet, J = 5.1 Hz    | -     | Acetaldehyde water hemiacetal          | -     |
| 6.35 | Doublet, J = 3.1 Hz    | 0.040 | 2-methylfuran CH                       | 0.036 |
| 6.40 | DD, J = 3.1 Hz, 1.9 Hz | 0.041 | 2-methylfuran CH                       | 0.037 |
| 6.75 | Doublet, J = 3.5 Hz    | 0.038 | p-cresol 2xCH next to CH               | 0.017 |
| 6.77 | DD, J = 3.7 Hz, 1.6 Hz | 0.33  | Furfural CH next to 2xCH               | 0.30  |
| 6.79 | Multiplet              | 0.025 | o-cresol aromatic CH                   | 0.023 |
| 6.85 | Doublet, J = 9.0 Hz    | 0.40  | Phenol 2xCH next to CH                 | 0.36  |
| 7.02 | Triplet, J = 9.0 Hz    | 0.20  | o-cresol aromatic CH                   | 0.18  |
| 7.08 | Doublet, J = 7.5 Hz    | 0.069 | o-cresol aromatic CH                   | 0.062 |
| 7.22 | Triplet, J = 7.3 Hz    | 0.94  | Phenol 2xCH next to 2xCH               | 0.42  |
| 7.25 | Doublet, J = 7.2 Hz    | 1.48  | 2-phenylethanol 2x aromatic CH         | 0.66  |
| 7.31 | Triplet, J = 7.5 Hz    | 1.42  | 2-phenylethanol 2x aromatic CH         | 0.64  |
| 7.57 | Doublet, J = 3.5 Hz    | 0.25  | Furfural CH                            | 0.22  |
| 7.94 | Singlet                | 0.24  | Furfural CH                            | 0.22  |
| 9.54 | Singlet                | 0.23  | Furfural CHO                           | 0.21  |
| 9.69 | Quartet, J = 2.9 Hz    | 0.013 | Acetaldehyde CHO                       | 0.012 |

**Table S13.** Signal assignment for NMR spectrum of new make spirit distillate fraction 2 produced using peated malt, recorded at University of Edinburgh using a 600 MHz spectrometer, PNMS2.

| $\delta_H$ / ppm | Multiplicity        | Integration | Inferences                                                                | Concentration/<br>mmol L <sup>-1</sup> |
|------------------|---------------------|-------------|---------------------------------------------------------------------------|----------------------------------------|
| 0                | Singlet             | 10          | DSS 3xCH <sub>3</sub>                                                     | 1.00                                   |
| 0.62             | Multiplet           | 2.22        | DSS CH <sub>2</sub>                                                       | 1.00                                   |
| 0.87             | Multiplet           | -           | Fusel alcohols CH <sub>3</sub> groups<br>carbon satellites                | -                                      |
| 1.17             | Distorted           | -           | Ethanol CH <sub>3</sub> suppressed                                        | -                                      |
| 1.24             | Triplet, J = 7.3 Hz | -           | Ethyl acetate CH <sub>3</sub> next to CH <sub>2</sub>                     | -                                      |
| 1.31             | Multiplet           | -           | Lactic acid CH <sub>3</sub> next to CH                                    | -                                      |
| 1.43             | Quartet, J = 6.9 Hz | 0.11        | 3-methyl-1-butanol CH <sub>2</sub> next to<br>CH and CH <sub>2</sub>      | 0.049                                  |
| 1.53             | Sextet, J = 7.1 Hz  | 0.48        | n-propanol CH <sub>2</sub> next to CH <sub>2</sub> and<br>CH <sub>3</sub> | 0.21                                   |
| 1.75             | Multiplet           | 2.30        | DSS CH <sub>2</sub>                                                       | 1.04                                   |
| 2.04             | Quintet, J = 2.0 Hz | 0.50        | DSS                                                                       | 0.22                                   |
| 2.07             | Singlet             | 0.74        | Acetic acid CH <sub>3</sub>                                               | 0.22                                   |
| 2.10             | Singlet             | 0.089       | Ethyl acetate CH <sub>3</sub> isolated                                    | 0.027                                  |
| 2.19             | Singlet             | 0.029       | o-cresol CH <sub>3</sub>                                                  | 0.0088                                 |
| 2.20             | Singlet             | 0.13        | Acetone 2xCH <sub>3</sub>                                                 | 0.020                                  |

|      |                        |        |                                                                |         |
|------|------------------------|--------|----------------------------------------------------------------|---------|
| 2.26 | Singlet                | 0.086  | p-cresol CH <sub>3</sub>                                       | 0.026   |
| 2.86 | Triplet, J = 6.7 Hz    | 2.60   | 2-phenylethanol CH <sub>2</sub>                                | 1.17    |
| 2.89 | Multiplet              | 2.29   | DSS CH <sub>2</sub>                                            | 1.03    |
| 2.96 | Triplet, J = 6.6 Hz    | 0.044  | 2-phenylethyl acetate CH <sub>2</sub>                          | 0.020   |
| 3.35 | Singlet                | 4.37   | Methanol CH <sub>3</sub>                                       | 1.31    |
| 3.55 | Triplet, J = 6.6 Hz    | 0.29   | n-propanol CH <sub>2</sub> next to CH <sub>2</sub> and OH      | 0.13    |
| 3.58 | Triplet, J = 6.6 Hz    | -      | 3-methyl-1-butanol CH <sub>2</sub> next to CH <sub>2</sub>     | -       |
| 3.83 | Triplet, J = 6.7 Hz    | 2.48   | 2-phenylethanol CH <sub>2</sub> next to CH <sub>2</sub> and OH | 1.12    |
| 4.13 | Quartet, J = 7.3 Hz    | -      | Lactic acid CH next to CH <sub>3</sub>                         | -       |
| 4.30 | Triplet, J = 7.4 Hz    | 0.0012 | 2-phenylethyl acetate CH <sub>2</sub>                          | 0.00054 |
| 4.56 | Singlet                | 0.18   | Furfuryl alcohol CH <sub>2</sub>                               | 0.082   |
| 4.79 | Broad Singlet          | -      | Water OH suppressed                                            | -       |
| 5.23 | Quartet, J = 5.1 Hz    | 0.018  | Acetaldehyde water hemiacetal                                  | -       |
| 6.40 | Doublet, J = 3.1 Hz    | 0.056  | 2-methylfuran CH                                               | 0.050   |
| 6.44 | DD, J = 3.0 Hz, 1.8 Hz | 0.056  | 2-methylfuran CH                                               | 0.051   |
| 6.75 | DD, J = 3.6 Hz, 1.6 Hz | 0.093  | Furfural CH                                                    | 0.084   |
| 6.78 | Doublet, J = 8.0 Hz    | 0.008  | p-cresol 2xCH next to CH                                       | 0.0034  |
| 6.80 | Doublet, J = 8.4 Hz    | 0.17   | o-cresol CH                                                    | 0.15    |
| 6.90 | Doublet, J = 7.7 Hz    | 0.50   | Phenol 2xCH next to CH                                         | 0.22    |
| 6.98 | Triplet, J = 7.4 Hz    | 0.23   | o-cresol CH next to 2xCH                                       | 0.21    |
| 7.06 | Doublet, J = 7.9 Hz    | 0.052  | p-cresol 2xCH next to CH                                       | 0.023   |
| 7.13 | Doublet, J = 8.0 Hz    | 0.18   | o-cresol CH next to CH                                         | 0.16    |
| 7.29 | Triplet, J = 7.3 Hz    | 0.78   | Phenol 2xCH next to 2xCH                                       | 0.35    |
| 7.31 | Doublet, J = 8.0 Hz    | 3.12   | 2-phenylethanol 2x aromatic CH                                 | 1.40    |
| 7.37 | Triplet, J = 7.5 Hz    | 2.29   | 2-phenylethanol 2x aromatic CH                                 | 1.03    |
| 7.57 | Doublet, J = 3.7 Hz    | 0.070  | Furfural CH                                                    | 0.063   |
| 7.91 | Singlet                | 0.070  | Furfural CH                                                    | 0.063   |
| 9.49 | Singlet                | 0.068  | Furfural CHO                                                   | 0.061   |
| 9.66 | Quartet, J = 2.9 Hz    | 0.0076 | Acetaldehyde CHO                                               | 0.0068  |

**Table S14.** Signal assignment for NMR spectrum of new make spirit distillate fraction 3 produced using peated malt, recorded at University of Edinburgh using a 600 MHz spectrometer, PNMS3.

| $\delta_{\text{H}}$ / ppm | Multiplicity        | Integration | Inferences                                              | Concentration/ mmol L <sup>-1</sup> |
|---------------------------|---------------------|-------------|---------------------------------------------------------|-------------------------------------|
| 0                         | Singlet             | 10          | DSS 3xCH <sub>3</sub>                                   | 1.00                                |
| 0.61                      | Multiplet           | 2.19        | DSS CH <sub>2</sub>                                     | 0.99                                |
| 0.77                      | Multiplet           | 0.27        | Fusel alcohols CH <sub>3</sub> groups carbon satellites | -                                   |
| 0.88                      | Multiplet           | 53.4        | Fusel alcohols CH <sub>3</sub> groups                   | -                                   |
| 0.98                      | Multiplet           | 0.46        | Fusel alcohols CH <sub>3</sub> groups carbon satellites | -                                   |
| 1.10                      | Triplet, J = 6.8 Hz | -           | Fusel alcohol ethyl ester CH <sub>3</sub>               | -                                   |

|      |                         |       |                                                                        |       |
|------|-------------------------|-------|------------------------------------------------------------------------|-------|
| 1.17 | Triplet, J = 7.7 Hz     | -     | Ethanol CH <sub>3</sub> suppressed                                     | -     |
| 1.24 | Triplet, J = 7.2 Hz     | 2.80  | Ethyl acetate CH <sub>3</sub> next to CH <sub>2</sub>                  | 0.84  |
| 1.27 | Triplet, J = 7.1 Hz     | 2.37  | Fusel alcohol ethyl ester CH <sub>3</sub>                              | -     |
| 1.31 | Triplet, J = 5.4 Hz     | 3.70  | Lactic acid CH <sub>3</sub> next to CH                                 | 1.11  |
| 1.36 | Doublet, J = 5.3 Hz     | 0.32  | Acetate ester                                                          | -     |
| 1.42 | Quartet, J = 7.0 Hz     | 6.41  | 3-methyl-1-butanol CH <sub>2</sub> next to CH and CH <sub>2</sub>      | 2.89  |
| 1.53 | Sextet, J = 7.1 Hz      | 6.75  | n-propanol CH <sub>2</sub> next to CH <sub>2</sub> and CH <sub>3</sub> | 3.04  |
| 1.65 | Nonet, J = 6.7 Hz       | 3.34  | 3-methyl-1-butanol CH next to 2xCH <sub>3</sub> and CH <sub>2</sub>    | 3.01  |
| 1.72 | Nonet, J = 5.2 Hz       | 5.21  | Isobutanol CH next to 2xCH <sub>3</sub> and CH <sub>2</sub>            | 4.69  |
| 1.77 | Multiplet               | -     | DSS                                                                    | -     |
| 2.02 | Singlet                 | 0.068 | Acetate ester                                                          | -     |
| 2.04 | Quintet, J = 2.1 Hz     | 0.56  | DSS                                                                    | 0.25  |
| 2.06 | Singlet                 | 2.26  | Acetic acid CH <sub>3</sub>                                            | 0.68  |
| 2.10 | Singlet                 | 0.15  | Ethyl acetate CH <sub>3</sub> isolated                                 | 0.044 |
| 2.19 | Singlet                 | 0.29  | o-cresol CH <sub>3</sub>                                               | 0.087 |
| 2.22 | Singlet                 | 0.51  | Acetone 2xCH <sub>3</sub>                                              | 0.077 |
| 2.23 | Doublet, J = 2.8 Hz     | 1.56  | Acetaldehyde CH <sub>3</sub> next to CH                                | 0.47  |
| 2.25 | Singlet                 | 0.14  | p-cresol CH <sub>3</sub>                                               | 0.041 |
| 2.33 | Multiplet               | -     | Ethyl ester                                                            | -     |
| 2.84 | Triplet, J = 6.9 Hz     | 2.76  | 2-phenylethanol CH <sub>2</sub> triplet, DSS CH <sub>2</sub> overlap   | -     |
| 2.96 | Triplet, J = 6.4 Hz     | 0.048 | 2-phenylethyl acetate CH <sub>2</sub>                                  | 0.021 |
| 3.22 | Singlet                 | 0.056 | Methanol CH <sub>3</sub> carbon satellite                              | -     |
| 3.23 | Doublet, J = 6.5 Hz     | 0.030 | Isobutanol carbon satellite                                            | -     |
| 3.34 | Singlet                 | 11.57 | Methanol CH <sub>3</sub>                                               | 3.47  |
| 3.35 | Doublet, J = 6.8 Hz     | 6.66  | Isobutanol CH <sub>2</sub> next to CH and OH                           | 3.00  |
| 3.36 | Singlet                 | 0.40  | Part of 2-methylbutanol diastereotopic CH <sub>2</sub>                 | -     |
| 3.38 | Doublet, J = 6.6 Hz     | 1.02  | Part of 2-methylbutanol diastereotopic CH <sub>2</sub>                 | -     |
| 3.46 | DD, J = 10.7 Hz, 6.0 Hz | 1.66  | Part of 2-methylbutanol diastereotopic CH <sub>2</sub>                 | 1.50  |
| 3.54 | Triplet, J = 6.7 Hz     | 4.29  | n-propanol CH <sub>2</sub>                                             | 1.93  |
| 3.61 | Triplet, J = 6.9 Hz     | -     | 3-methyl-1-butanol CH <sub>2</sub> next to CH <sub>2</sub>             | -     |
| 3.64 | Distorted               | -     | Ethanol CH <sub>2</sub> suppressed                                     | -     |
| 3.81 | Triplet, J = 6.9 Hz     | 1.81  | Phenylethanol CH <sub>2</sub>                                          | 0.81  |
| 3.84 | Singlet                 | 0.10  | Guaiacol OCH <sub>3</sub>                                              | 0.031 |
| 4.12 | Quartet, J = 7.1 Hz     | 1.32  | Lactic acid CH next to CH <sub>3</sub>                                 | 1.19  |
| 4.32 | Triplet, J = 6.6 Hz     | 0.028 | 2-phenylethyl acetate CH <sub>2</sub>                                  | 0.013 |
| 4.55 | Singlet                 | 0.16  | Furfuryl alcohol CH <sub>2</sub>                                       | 0.070 |

|      |                        |       |                                |       |
|------|------------------------|-------|--------------------------------|-------|
| 4.83 | Broad singlet          | -     | Water OH suppressed            | -     |
| 4.92 | Quartet, J = 5.2 Hz    | -     | Acetaldehyde ethyl hemiacetal  | -     |
| 5.22 | Quartet, J = 5.2 Hz    | 0.41  | Acetaldehyde water hemiacetal  | -     |
| 6.38 | Doublet, J = 3.2 Hz    | 0.068 | 2-methylfuran CH               | 0.062 |
| 6.42 | DD, J = 2.9 Hz, 2.0 Hz | 0.066 | 2-methylfuran CH               | 0.059 |
| 6.72 | Multiplet              | 0.056 | p-cresol 2x CH                 | 0.025 |
| 6.76 | DD, J = 3.6 Hz, 1.6 Hz | 0.084 | Furfural CH next to 2xCH       | 0.075 |
| 6.78 | Doublet, J = 8.3 Hz    | 0.15  | o-cresol CH                    | 0.14  |
| 6.88 | Doublet, J = 7.9 Hz    | 0.48  | Phenol 2xCH next to CH         | 0.21  |
| 6.95 | Triplet, J = 7.3 Hz    | 0.20  | o-cresol CH                    | 0.18  |
| 7.03 | Doublet, J = 7.4 Hz    | 0.058 | p-cresol 2xCH next to CH       | 0.026 |
| 7.10 | Doublet, J = 8.5 Hz    | 0.17  | o-cresol CH                    | 16.2  |
| 7.26 | Doublet, J = 7.3 Hz    | 0.71  | Phenol 2xCH next to 2xCH       | 0.32  |
| 7.29 | Doublet, J = 7.3 Hz    | 2.39  | 2-phenylethanol 2x aromatic CH | 1.07  |
| 7.36 | Triplet, J = 7.5 Hz    | 1.81  | 2-phenylethanol 2x aromatic CH | 0.82  |
| 7.57 | Doublet, J = 3.7 Hz    | 0.067 | Furfural CH                    | 0.060 |
| 7.92 | Singlet                | 0.064 | Furfural CH                    | 0.058 |
| 9.49 | Singlet                | 0.058 | Furfural CHO                   | 0.052 |
| 9.66 | Quartet, J = 2.9 Hz    | 0.44  | Acetaldehyde CHO               | 0.40  |

**Table S15.** Signal assignment for NMR spectrum of low wines produced using spruce smoked malt, recorded at University of Edinburgh using a 600 MHz spectrometer, SLW.

| $\delta_H$ / ppm | Multiplicity        | Integration | Inferences                                                                | Concentration/<br>mmol L <sup>-1</sup> |
|------------------|---------------------|-------------|---------------------------------------------------------------------------|----------------------------------------|
| 0                | Singlet             | 10          | DSS 3xCH <sub>3</sub>                                                     | 1.00                                   |
| 0.59             | Multiplet           | 2.23        | DSS CH <sub>2</sub>                                                       | 1.00                                   |
| 0.78             | Multiplet           | 1.38        | Fusel alcohols CH <sub>3</sub> groups<br>carbon satellites                | -                                      |
| 0.89             | Multiplet           | 219.24      | Fusel alcohols CH <sub>3</sub> groups                                     | -                                      |
| 0.99             | Multiplet           | 1.08        | Fusel alcohols CH <sub>3</sub> groups<br>carbon satellites                | -                                      |
| 1.09             | Triplet, J = 8.4 Hz | -           | Ethanol CH <sub>3</sub> carbon satellite                                  | -                                      |
| 1.11             | Triplet, J = 7.3 Hz | 4.25        | Fusel alcohol ethyl ester CH <sub>3</sub>                                 | -                                      |
| 1.18             | Distorted           | -           | Ethanol CH <sub>3</sub> suppressed                                        | -                                      |
| 1.25             | Triplet, J = 7.1 Hz | 13.63       | Ethyl acetate CH <sub>3</sub> next to CH <sub>2</sub>                     | 4.09                                   |
| 1.29             | Doublet, J = 5.6 Hz | 4.58        | Fusel alcohol ethyl ester CH <sub>3</sub>                                 | -                                      |
| 1.31             | Doublet, J = 5.2 Hz | 14.29       | Lactic acid CH <sub>3</sub> next to CH                                    | 4.29                                   |
| 1.36             | Multiplet           | -           | Acetate ester                                                             | -                                      |
| 1.43             | Quartet, J = 7.0 Hz | 30.05       | 3-methyl-1-butanol CH <sub>2</sub> next to<br>CH and CH <sub>2</sub>      | 13.52                                  |
| 1.49             | Multiplet           | -           | n-butanol CH <sub>2</sub> groups                                          | -                                      |
| 1.54             | Sextet, J = 7.2 Hz  | 21.22       | n-propanol CH <sub>2</sub> next to CH <sub>2</sub> and<br>CH <sub>3</sub> | 9.55                                   |
| 1.68             | Nonet, J = 6.7 Hz   | 12.52       | 3-methyl-1-butanol CH next to<br>2xCH <sub>3</sub> and CH <sub>2</sub>    | 11.27                                  |

|      |                         |       |                                                             |        |
|------|-------------------------|-------|-------------------------------------------------------------|--------|
| 1.73 | Nonet, J = 6.7 Hz       | 13.43 | Isobutanol CH next to 2xCH <sub>3</sub> and CH <sub>2</sub> | 12.08  |
| 1.78 | Multiplet               | 1.80  | DSS CH <sub>2</sub>                                         | 0.81   |
| 1.94 | Singlet                 | 0.052 | Acetic acid CH <sub>3</sub> carbon satellite                | -      |
| 2.05 | Singlet                 | 8.95  | Acetic acid CH <sub>3</sub>                                 | 2.69   |
| 2.08 | Singlet                 | 0.060 | Ethyl acetate CH <sub>3</sub> isolated                      | 0.018  |
| 2.16 | Singlet                 | 0.075 | Acetic acid CH <sub>3</sub> carbon satellite                | -      |
| 2.18 | Singlet                 | 0.22  | o-cresol CH <sub>3</sub>                                    | 0.067  |
| 2.21 | Singlet                 | 0.76  | Acetone 2xCH <sub>3</sub>                                   | 0.11   |
| 2.23 | Doublet, J = 2.9 Hz     | 3.65  | Acetaldehyde CH <sub>3</sub>                                | 1.09   |
| 2.27 | Multiplet               | 0.10  | p-cresol CH <sub>3</sub>                                    | -      |
| 2.30 | Triplet, J = 7.4 Hz     | 1.68  | Ethyl ester                                                 | -      |
| 2.82 | Multiplet               | 2.35  | DSS CH <sub>2</sub>                                         | 1.06   |
| 2.85 | Singlet                 | 0.80  | Part of 2-phenylethanol CH <sub>2</sub>                     | -      |
| 2.93 | Triplet, J = 7.0 Hz     | 0.092 | 2-phenylethyl acetate                                       | 0.042  |
| 3.21 | Doublet, J = 6.6 Hz     | 0.19  | Isobutanol carbon satellite                                 | -      |
| 3.23 | Singlet                 | 0.079 | Methanol CH <sub>3</sub> carbon satellite                   | -      |
| 3.33 | Doublet, J = 6.6 Hz     | 28.51 | Isobutanol CH <sub>2</sub> next to CH and OH                | 12.83  |
| 3.35 | Singlet                 | 9.28  | Methanol CH <sub>3</sub>                                    | 2.78   |
| 3.44 | DD, J = 10.6 Hz, 6.0 Hz | 7.40  | Part of 2-methylbutanol diastereotopic CH <sub>2</sub>      | 6.66   |
| 3.48 | Quartet, J = 7.1 Hz     | -     | Ethanol CH <sub>2</sub> carbon satellite                    | -      |
| 3.52 | Triplet, J = 6.8 Hz     | 16.75 | n-propanol CH <sub>2</sub>                                  | 7.54   |
| 3.59 | Triplet, J = 7.1 Hz     | 23.10 | 3-methyl-1-butanol CH <sub>2</sub> next to CH <sub>2</sub>  | 10.39  |
| 3.63 | Distorted               | -     | Ethanol CH <sub>2</sub> suppressed                          | -      |
| 3.75 | Quartet, J = 7.0 Hz     | -     | Ethanol CH <sub>2</sub> carbon satellite                    | -      |
| 4.12 | Quartet, J = 7.2 Hz     | 7.84  | Lactic acid CH next to CH <sub>3</sub>                      | 2.35   |
| 4.27 | Triplet, J = 6.8 Hz     | 0.22  | 2-phenylethyl acetate CH <sub>2</sub>                       | 0.097  |
| 4.54 | Singlet                 | -     | Furfuryl alcohol CH <sub>2</sub>                            | -      |
| 4.82 | Broad singlet           | -     | Water OH suppressed                                         | -      |
| 5.21 | Quartet, J = 5.2 Hz     | 1.07  | Acetaldehyde water hemiacetal                               | -      |
| 6.33 | Doublet, J = 3.0 Hz     | 0.017 | 2-methylfuran CH                                            | 0.015  |
| 6.36 | Singlet                 | 0.012 | 2-methylfuran CH                                            | 0.010  |
| 6.73 | Multiplet               | 0.048 | p-cresol 2xCH next to CH                                    | 0.043  |
| 6.76 | DD, J = 3.3 Hz, 1.6 Hz  | 0.099 | Furfural CH next to 2xCH                                    | 0.089  |
| 6.84 | Doublet, J = 8.1 Hz     | 0.12  | Phenol 2xCH next to CH                                      | 0.055  |
| 6.90 | Doublet, J = 7.1 Hz     | 0.010 | Guaiacol CH                                                 | 0.0091 |
| 6.92 | Doublet, J = 7.5 Hz     | 0.018 | p-cresol 2xCH next to CH                                    | 0.0083 |
| 6.98 | Triplet, J = 8.4 Hz     | 0.050 | o-cresol CH next to 2xCH                                    | 0.044  |
| 7.04 | Doublet, J = 7.4 Hz     | 0.039 | o-cresol CH next to CH                                      | 0.035  |
| 7.19 | Triplet, J = 7.2 Hz     | 0.21  | Phenol 2xCH next to 2xCH                                    | 0.094  |
| 7.23 | Doublet, J = 7.4 Hz     | 0.35  | 2-phenylethanol 2x aromatic CH                              | 0.16   |
| 7.28 | Triplet, J = 7.4 Hz     | 0.30  | 2-phenylethanol 2x aromatic CH                              | 0.14   |

|      |                     |        |                  |        |
|------|---------------------|--------|------------------|--------|
| 7.55 | Doublet, J = 3.7 Hz | 0.095  | Furfural CH      | 0.086  |
| 7.94 | Singlet             | 0.095  | Furfural CH      | 0.086  |
| 8.12 | Singlet             | 0.048  | Ethyl formate CH | 0.043  |
| 9.56 | Singlet             | 0.096  | Furfural CHO     | 0.086  |
| 9.59 | Singlet             | 0.012  | 5-HMF CHO        | 0.010  |
| 9.71 | Quartet, J = 2.9 Hz | 1.08   | Acetaldehyde CHO | 0.98   |
| 9.99 | Singlet             | 0.0036 | Vanillin CHO     | 0.0032 |

**Table S16.** Signal assignment for NMR spectrum of new make spirit distillate fraction 1 produced using spruce smoked malt, recorded at University of Edinburgh using a 600 MHz spectrometer, SNMS1.

| $\delta_H$ / ppm | Multiplicity        | Integration | Inferences                                                                | Concentration/<br>mmol L <sup>-1</sup> |
|------------------|---------------------|-------------|---------------------------------------------------------------------------|----------------------------------------|
| 0                | Singlet             | 10          | DSS 3xCH <sub>3</sub>                                                     | 1.00                                   |
| 0.59             | Multiplet           | 2.22        | DSS CH <sub>2</sub>                                                       | 1.00                                   |
| 0.79             | Multiplet           | 0.49        | Fusel alcohols CH <sub>3</sub> groups<br>carbon satellites                | -                                      |
| 0.89             | Multiplet           | 67.24       | Fusel alcohols CH <sub>3</sub> groups                                     | -                                      |
| 0.99             | Multiplet           | 0.43        | Fusel alcohols CH <sub>3</sub> groups<br>carbon satellites                | -                                      |
| 1.11             | Multiplet           | -           | Fusel alcohol ethyl ester CH <sub>3</sub>                                 | -                                      |
| 1.19             | Distorted           | -           | Ethanol CH <sub>3</sub> suppressed                                        | -                                      |
| 1.25             | Triplet, J = 7.2 Hz | -           | Ethyl acetate CH <sub>3</sub> next to CH <sub>2</sub>                     | -                                      |
| 1.29             | Multiplet           | -           | Fusel alcohol ethyl ester CH <sub>3</sub>                                 | -                                      |
| 1.31             | Doublet, J = 5.1 Hz | 0.79        | Lactic acid CH <sub>3</sub> next to CH                                    | 0.24                                   |
| 1.35             | Multiplet           | -           | Acetate ester                                                             | -                                      |
| 1.43             | Quartet, J = 6.9 Hz | 8.85        | 3-methyl-1-butanol CH <sub>2</sub> next to<br>CH and CH <sub>2</sub>      | 3.98                                   |
| 1.54             | Sextet, J = 7.1 Hz  | 10.6        | n-propanol CH <sub>2</sub> next to CH <sub>2</sub> and<br>CH <sub>3</sub> | 4.78                                   |
| 1.66             | Nonet, J = 6.7 Hz   | 4.08        | 3-methyl-1-butanol CH next to<br>2xCH <sub>3</sub> and CH <sub>2</sub>    | 3.67                                   |
| 1.73             | Nonet, J = 6.7 Hz   | 4.30        | Isobutanol CH next to 2xCH <sub>3</sub><br>and CH <sub>2</sub>            | 3.87                                   |
| 1.76             | Multiplet           | -           | DSS                                                                       | -                                      |
| 2.01             | Quintet, J = 2.1 Hz | 0.61        | DSS                                                                       | 0.27                                   |
| 2.03             | Singlet             | 0.16        | Acetate ester                                                             | -                                      |
| 2.04             | Singlet             | 0.18        | Acetic acid CH <sub>3</sub>                                               | 0.056                                  |
| 2.06             | Singlet             | 0.32        | Ethyl acetate CH <sub>3</sub> isolated                                    | 0.096                                  |
| 2.18             | Singlet             | 0.60        | o-cresol CH <sub>3</sub>                                                  | 0.18                                   |
| 2.21             | Singlet             | 0.25        | Acetone 2xCH <sub>3</sub>                                                 | 0.037                                  |
| 2.26             | Singlet             | 0.25        | p-cresol CH <sub>3</sub>                                                  | 0.075                                  |
| 2.29             | Triplet, J = 7.3 Hz | 0.43        | Ethyl ester                                                               | -                                      |
| 2.83             | Multipet            | 4.44        | 2-phenylethanol CH <sub>2</sub> , DSS CH <sub>2</sub><br>overlap          | -                                      |
| 2.94             | Triplet, J = 6.8 Hz | 0.13        | 2-phenylethyl acetate CH <sub>2</sub>                                     | 0.058                                  |
| 3.22             | Doublet, J = 6.7 Hz | 0.056       | Isobutanol carbon satellite                                               | -                                      |

|      |                         |       |                                                            |       |
|------|-------------------------|-------|------------------------------------------------------------|-------|
| 3.23 | Singlet                 | 0.043 | Methanol CH <sub>3</sub>                                   | -     |
| 3.34 | Doublet, J = 6.7 Hz     | 7.31  | Isobutanol CH <sub>2</sub> next to CH and OH               | 3.29  |
| 3.35 | Singlet                 | 6.96  | Methanol CH <sub>3</sub>                                   | 2.09  |
| 3.45 | DD, J = 10.7 Hz, 5.9 Hz | 1.84  | Part of 2-methylbutanol diastereotopic CH <sub>2</sub>     | 1.66  |
| 3.53 | Triplet, J = 6.8 Hz     | 9.06  | n-propanol CH <sub>2</sub>                                 | 4.08  |
| 3.60 | Triplet, J = 7.0 Hz     | -     | 3-methyl-1-butanol CH <sub>2</sub> next to CH <sub>2</sub> | -     |
| 3.64 | Distorted               | -     | Ethanol CH <sub>2</sub> suppressed                         | -     |
| 3.78 | Triplet, J = 7.2 Hz     | 2.25  | Phenylethanol CH <sub>2</sub>                              | 1.01  |
| 3.82 | Singlet                 | -     | Eugenol OCH <sub>3</sub>                                   | -     |
| 3.84 | Singlet                 | 0.28  | Guaiacol OCH <sub>3</sub>                                  | -     |
| 4.12 | Quartet, J = 7.2 Hz     | 0.35  | Lactic acid CH next to CH <sub>3</sub>                     | 0.31  |
| 4.29 | Triplet, J = 6.7 Hz     | 0.014 | 2-phenylethyl acetate CH <sub>2</sub>                      | 0.055 |
| 4.54 | Singlet                 | 0.17  | Furfuryl alcohol CH <sub>2</sub>                           | 0.075 |
| 4.84 | Broad Singlet           | -     | Water OH suppressed                                        | -     |
| 5.21 | Quartet, J = 5.3 Hz     | 0.076 | Acetaldehyde water hemiacetal                              | -     |
| 6.36 | Doublet, J = 3.2 Hz     | 0.068 | 2-methylfuran CH                                           | 0.061 |
| 6.40 | Multiplet               | 0.063 | 2-methylfuran CH                                           | 0.057 |
| 6.77 | DD, J = 3.6 Hz, 1.5 Hz  | 0.23  | Furfural CH                                                | 0.21  |
| 6.80 | Multiplet               | 0.27  | o-cresol                                                   | 0.24  |
| 6.85 | Doublet, J = 7.6 Hz     | 0.69  | Phenol 2xCH next to CH                                     | 0.29  |
| 7.04 | Triplet, J = 8.5 Hz     | 0.35  | o-cresol CH next to 2xCH                                   | 0.32  |
| 7.10 | Doublet, J = 6.8 Hz     | 0.24  | o-cresol CH next to CH                                     | 0.22  |
| 7.23 | Triplet, J = 7.3 Hz     | 1.46  | Phenol 2xCH next to 2xCH                                   | 0.66  |
| 7.26 | Doublet, J = 7.1 Hz     | 2.33  | 2-phenylethanol 2x aromatic CH                             | 1.05  |
| 7.32 | Triplet, J = 7.5 Hz     | 2.18  | 2-phenylethanol 2x aromatic CH                             | 0.98  |
| 7.58 | Doublet, J = 3.8 Hz     | 0.19  | Furfural CH                                                | 0.17  |
| 7.94 | Singlet                 | 0.19  | Furfural CH                                                | 0.17  |
| 9.53 | Singlet                 | 0.18  | Furfural CHO                                               | 0.16  |
| 9.69 | Quartet, J = 2.7 Hz     | 0.023 | Acetaldehyde CHO                                           | 0.069 |

**Table S17.** Signal assignment for NMR spectrum of new make spirit distillate fraction 2 produced using spruce smoked malt, recorded at University of Edinburgh using a 600 MHz spectrometer, SNMS2.

| $\delta_H$ / ppm | Multiplicity        | Integration | Inferences                                                        | Concentration / mmol L <sup>-1</sup> |
|------------------|---------------------|-------------|-------------------------------------------------------------------|--------------------------------------|
| 0                | Singlet             | 10          | DSS 3xCH <sub>3</sub>                                             | 1.00                                 |
| 0.62             | Multiplet           | 2.22        | DSS CH <sub>2</sub>                                               | 1.00                                 |
| 0.87             | Multiplet           | -           | Fusel alcohols CH <sub>3</sub> groups                             | -                                    |
| 1.17             | Distorted           | -           | Ethanol CH <sub>3</sub> suppressed                                | -                                    |
| 1.24             | Triplet, J = 7.4 Hz | -           | Ethyl acetate CH <sub>3</sub> next to CH <sub>2</sub>             | -                                    |
| 1.31             | Multiplet           | -           | Lactic acid CH <sub>3</sub> next to CH                            | -                                    |
| 1.43             | Quartet, J = 6.9 Hz | 0.10        | 3-methyl-1-butanol CH <sub>2</sub> next to CH and CH <sub>2</sub> | 0.048                                |
| 1.53             | Quartet, J = 7.1 Hz | 0.37        | n-propanol CH <sub>2</sub> next to CH <sub>2</sub> and            | 0.17                                 |

|      |                        |        | CH <sub>3</sub>                                            |         |
|------|------------------------|--------|------------------------------------------------------------|---------|
| 1.76 | Multiplet              | 2.30   | DSS                                                        | 1.04    |
| 2.04 | Quintet, J = 2.1 Hz    | 0.55   | DSS                                                        | 0.25    |
| 2.06 | Singlet                | 0.19   | Acetic acid CH <sub>3</sub>                                | 0.056   |
| 2.19 | Singlet                | 0.045  | o-cresol CH <sub>3</sub>                                   | 0.013   |
| 2.22 | Singlet                | -      | Acetone CH <sub>3</sub>                                    | -       |
| 2.26 | Singlet                | 0.16   | p-cresol CH <sub>3</sub>                                   | 0.049   |
| 2.86 | Triplet, J = 6.7 Hz    | 3.92   | 2-phenylethanol CH <sub>2</sub>                            | 1.76    |
| 2.90 | Multiplet              | 2.26   | DSS CH <sub>2</sub>                                        | 1.02    |
| 2.96 | Singlet                | 0.017  | Phenylethyl acetate CH <sub>2</sub>                        | 0.0077  |
| 3.35 | Singlet                | 10.3   | Methanol CH <sub>3</sub>                                   | 3.09    |
| 3.55 | Triplet, J = 6.6 Hz    | -      | n-propanol CH <sub>2</sub>                                 | -       |
| 3.58 | Triplet, J = 6.6 Hz    | -      | 3-methyl-1-butanol CH <sub>2</sub> next to CH <sub>2</sub> | -       |
| 3.83 | Triplet, J = 6.7 Hz    | 3.93   | 2-phenylethanol CH <sub>2</sub>                            | 1.77    |
| 4.13 | Quartet, J = 7.2 Hz    | 0.022  | Lactic acid CH next to CH <sub>3</sub>                     | 0.020   |
| 4.30 | Triplet, J = 7.3 Hz    | 0.0006 | 2-phenylethyl acetate CH <sub>2</sub>                      | 0.00027 |
| 4.57 | Singlet                | 0.25   | Furfuryl alcohol CH <sub>2</sub>                           | 0.11    |
| 4.78 | Singlet                | -      | Water OH suppressed                                        | -       |
| 5.24 | Quartet, J = 5.2 Hz    | 0.034  | Acetaldehyde water hemiacetal                              | -       |
| 6.40 | Doublet, J = 3.1 Hz    | 0.10   | 2-methylfuran CH                                           | 0.094   |
| 6.44 | DD, J = 3.2 Hz, 1.9 Hz | 0.10   | 2-methylfuran CH                                           | 0.094   |
| 6.76 | Singlet                | -      | Furfural CH                                                | -       |
| 6.78 | Doublet, J = 8.1 Hz    | 0.057  | p-cresol 2xCH next to CH                                   | 0.026   |
| 6.81 | Triplet, J = 7.9 Hz    | 0.42   | o-cresol CH next to 2xCH                                   | 0.38    |
| 6.91 | Doublet, J = 7.9 Hz    | 0.90   | Phenol 2xCH next to CH                                     | 0.80    |
| 6.98 | Triplet, J = 7.3 Hz    | 0.38   | o-cresol CH next to 2xCH                                   | 0.35    |
| 7.06 | Doublet, J = 7.8 Hz    | 0.080  | p-cresol 2xCH next to CH                                   | 0.036   |
| 7.29 | Triplet, J = 7.3 Hz    | 1.68   | Phenol 2xCH next to 2xCH                                   | 0.76    |
| 7.31 | Doublet, J = 7.9 Hz    | 4.34   | 2-phenylethanol 2x aromatic CH                             | 1.95    |
| 7.38 | Triplet, J = 7.6 Hz    | 3.51   | 2-phenylethanol 2x aromatic CH                             | 1.58    |
| 7.57 | Doublet, J = 3.6 Hz    | 0.052  | Furfural CH                                                | 0.046   |
| 7.91 | Singlet                | 0.051  | Furfural CH                                                | 0.043   |
| 9.49 | Singlet                | 0.048  | Furfural CHO                                               | 0.043   |
| 9.66 | Quartet, J = 1.8 Hz    | 0.061  | Acetaldehyde CHO                                           | 0.055   |

**Table S18.** Signal assignment for NMR spectrum of new make spirit distillate fraction 3 produced using spruce smoked malt, recorded at University of Edinburgh using a 600 MHz spectrometer, SNMS3.



|          |        |   |       |       |        |              |
|----------|--------|---|-------|-------|--------|--------------|
| PLW1     |        |   |       |       |        |              |
| Sample 1 | 23.63  | 1 | 2.78  | 6.82  | 0.9866 | 8.71         |
| Sample 2 | 23.64  | 1 | 2.78  | 6.81  | 0.9866 | 8.71         |
| Sample 3 | 23.66  | 1 | 2.78  | 6.81  | 0.9866 | 8.70         |
|          |        |   |       |       |        | 8.70 ± 0.01  |
| PLW2     |        |   |       |       |        |              |
| Sample 1 | 124.75 | 1 | 0.53  | 1.35  | 0.9958 | 1.74         |
| Sample 2 | 124.03 | 1 | 0.54  | 1.36  | 0.9958 | 1.75         |
| Sample 3 | 124.23 | 1 | 0.54  | 1.36  | 0.9958 | 1.75         |
|          |        |   |       |       |        | 1.75 ± 0.01  |
| PNMS1_1  |        |   |       |       |        |              |
| Sample 1 | 0.82   | 1 | 44.79 | 67.47 | 0.8736 | 76.34        |
| Sample 2 | 0.82   | 1 | 44.98 | 67.64 | 0.8732 | 76.50        |
| Sample 3 | 0.81   | 1 | 45.05 | 67.70 | 0.8731 | 76.55        |
|          |        |   |       |       |        | 76.46 ± 0.11 |
| PNMS1_2  |        |   |       |       |        |              |
| Sample 1 | 0.82   | 1 | 44.77 | 67.45 | 0.8736 | 76.32        |
| Sample 2 | 0.82   | 1 | 44.96 | 67.62 | 0.8732 | 76.48        |
| Sample 3 | 0.82   | 1 | 44.83 | 67.51 | 0.8735 | 76.37        |
|          |        |   |       |       |        | 76.39 ± 0.08 |
| PNMS2_1  |        |   |       |       |        |              |
| Sample 1 | 2.14   | 1 | 26.96 | 48.55 | 0.9170 | 57.66        |
| Sample 2 | 2.13   | 1 | 27.04 | 48.65 | 0.9168 | 57.76        |
| Sample 3 | 2.13   | 1 | 27.05 | 48.66 | 0.9167 | 57.78        |
|          |        |   |       |       |        | 57.73 ± 0.06 |
| PNMS2_2  |        |   |       |       |        |              |
| Sample 1 | 2.23   | 1 | 26.01 | 47.33 | 0.9196 | 56.37        |
| Sample 2 | 2.23   | 1 | 26.01 | 47.33 | 0.9196 | 56.37        |
| Sample 3 | 2.23   | 1 | 26.03 | 47.36 | 0.9196 | 56.40        |
|          |        |   |       |       |        | 56.38 ± 0.02 |
| PNMS3_1  |        |   |       |       |        |              |
| Sample 1 | 28.42  | 1 | 2.32  | 5.72  | 0.9883 | 7.32         |
| Sample 2 | 28.43  | 1 | 2.32  | 5.72  | 0.9883 | 7.32         |
| Sample 3 | 28.44  | 1 | 2.32  | 5.72  | 0.9883 | 7.32         |
|          |        |   |       |       |        | 7.32 ± 0.01  |
| PNMS3_2  |        |   |       |       |        |              |
| Sample 1 | 30.14  | 1 | 2.19  | 5.41  | 0.9887 | 6.93         |
| Sample 2 | 30.16  | 1 | 2.18  | 5.40  | 0.9887 | 6.92         |
| Sample 3 | 30.14  | 1 | 2.19  | 5.41  | 0.9887 | 6.92         |
|          |        |   |       |       |        | 6.92 ± 0.01  |

**Table S19.** ABV measurements performed on low wines and new make spirit samples using <sup>1</sup>H NMR.

## References

1. B. Harrison, O. Fagnen, F. Jack and J. Brosnan, *J. Inst. Brew.*, 2011, **117**, 106–112.
